# Supplementary material for: Reproducibility and imputation of air toxics data
Source: Royal Society of Chemistry journal article supplement (doi:10.1039/b709816b), 2007-01-01
Supplement: b709816b.pdf [file b709816b.pdf]

## Reproducibility and Imputation of Air Toxics Data

Hien Q. Le<sup>1</sup>, Stuart A. Batterman<sup>1,\*</sup>, Robert L. Wahl<sup>2</sup>

<sup>1</sup>University of Michigan, <sup>2</sup>Michigan Department of Community Health

\*corresponding author

### SUPPLEMENTAL MATERIALS – FIGURES AND TABLES

Page

|                                                                                                                                                                                                                      |    |
|----------------------------------------------------------------------------------------------------------------------------------------------------------------------------------------------------------------------|----|
| Supplement 1. Statistics of concentrations at Dearborn, Michigan for VOCs and carbonyls analyzed by Eastern Research Group (ERG) laboratory. DF=detection frequency; MDL=method detection limit.....                 | 2  |
| Supplement 2. Statistics of concentrations at Dearborn, Michigan for VOCs and carbonyls analyzed by Michigan Department of Environmental Quality (MDEQ) laboratory.....                                              | 4  |
| Supplement 3. Outlier analysis using Gumbel distribution (type I). ERG= Eastern Research Group; MDEQ= Michigan Department of Environmental Quality.....                                                              | 6  |
| Supplement 4. Log-normal distribution plots for carbonyls and VOCs concentrations with detection frequencies above 20% from Eastern Research Group laboratory. Duplicates were averaged; Outliers were excluded..... | 7  |
| Supplement 5. Log-normal distribution plots for carbonyls and VOCs concentrations with detection frequencies above 20% from Michigan Department of Environmental Quality laboratory.....                             | 13 |
| Supplement 6. Spearman rank correlation coefficients between air toxics and criteria pollutants and meteorological variables. ....                                                                                   | 18 |
| Supplement 7. Spearman rank correlation coefficients between selected carbonyls and VOCs. ....                                                                                                                       | 19 |
| Supplement 8. Variable dictionary .....                                                                                                                                                                              | 20 |
| Supplement 9. Performance indicators for MI and OLE estimates for carbonyls.....                                                                                                                                     | 21 |
| Supplement 10. Performance indicators for MI and OLE estimates for VOCs. Otherwise as Supplement 9. ....                                                                                                             | 23 |
| Supplement 11. Performance indicators for OLE using both un-transformed and log-transformed data.....                                                                                                                | 27 |
| Supplement 12. Performance indicators for MI using both untransformed and log-transformed data. ....                                                                                                                 | 28 |

Supplement 1. Statistics of concentrations at Dearborn, Michigan for VOCs and carbonyls analyzed by Eastern Research Group (ERG) laboratory. DF=detection frequency; MDL=method detection limit.

| Compound                  | ERG laboratory-Sample 1 |           |               |                |              |               | ERG laboratory-Sample 2 |           |               |                |              |               | MDL<br>(ppbv) |
|---------------------------|-------------------------|-----------|---------------|----------------|--------------|---------------|-------------------------|-----------|---------------|----------------|--------------|---------------|---------------|
|                           | N                       | DF<br>(%) | Min<br>(ppbv) | Mean<br>(ppbv) | SD<br>(ppbv) | Max<br>(ppbv) | N                       | DF<br>(%) | Min<br>(ppbv) | Mean<br>(ppbv) | SD<br>(ppbv) | Max<br>(ppbv) |               |
| <b>Carbonyls</b>          |                         |           |               |                |              |               |                         |           |               |                |              |               |               |
| 2,5-Dimethylbenzaldehyde  | 266                     | 31        | 0.003         | 0.009          | 0.020        | 0.280         | 54                      | 31        | 0.003         | 0.010          | 0.022        | 0.147         | 0.005         |
| Acetaldehyde              | 266                     | 100       | 0.007         | 1.203          | 0.998        | 4.406         | 54                      | 100       | 0.024         | 0.972          | 0.604        | 3.056         | 0.014         |
| Acetone                   | 266                     | 100       | 0.017         | 1.474          | 1.247        | 5.770         | 54                      | 100       | 0.025         | 1.198          | 0.875        | 4.611         | 0.008         |
| Benzaldehyde              | 266                     | 98        | 0.002         | 0.050          | 0.043        | 0.422         | 54                      | 98        | 0.002         | 0.048          | 0.035        | 0.152         | 0.004         |
| Crotonaldehyde            | 266                     | 79        | 0.003         | 0.027          | 0.051        | 0.309         | 54                      | 80        | 0.003         | 0.021          | 0.044        | 0.307         | 0.006         |
| Formaldehyde              | 266                     | 100       | 0.008         | 2.406          | 1.972        | 20.980        | 54                      | 100       | 0.019         | 2.373          | 1.512        | 7.061         | 0.016         |
| Hexaldehyde               | 266                     | 100       | 0.002         | 0.123          | 0.167        | 0.722         | 54                      | 96        | 0.002         | 0.091          | 0.123        | 0.583         | 0.004         |
| iso-Butyraldehyde         | 266                     | 99        | 0.003         | 0.206          | 0.175        | 0.801         | 54                      | 98        | 0.003         | 0.158          | 0.099        | 0.601         | 0.005         |
| iso-Valeraldehyde         | 266                     | 22        | 0.002         | 0.020          | 0.058        | 0.377         | 54                      | 17        | 0.002         | 0.024          | 0.076        | 0.380         | 0.004         |
| Propionaldehyde           | 266                     | 89        | 0.004         | 0.147          | 0.153        | 1.440         | 54                      | 93        | 0.004         | 0.124          | 0.082        | 0.377         | 0.007         |
| Tolualdehydes             | 266                     | 92        | 0.004         | 0.045          | 0.051        | 0.591         | 54                      | 96        | 0.004         | 0.045          | 0.038        | 0.193         | 0.008         |
| Valeraldehyde             | 266                     | 90        | 0.002         | 0.061          | 0.067        | 0.377         | 54                      | 94        | 0.002         | 0.040          | 0.034        | 0.213         | 0.003         |
| <b>VOCs</b>               |                         |           |               |                |              |               |                         |           |               |                |              |               |               |
| 1,1,1-Trichloroethane     | 282                     | 5         | 0.030         | 0.033          | 0.014        | 0.167         | 52                      | 4         | 0.030         | 0.032          | 0.008        | 0.072         | 0.060         |
| 1,1,2,2-Tetrachloroethane | 282                     | 0         | 0.030         | 0.030          | 0.000        | 0.030         | 52                      | 0         | 0.030         | 0.030          | 0.000        | 0.030         | 0.060         |
| 1,1,2-Trichloroethane     | 282                     | 0         | 0.030         | 0.030          | 0.000        | 0.030         | 52                      | 0         | 0.030         | 0.030          | 0.000        | 0.030         | 0.060         |
| 1,1-Dichloroethane        | 282                     | 0         | 0.040         | 0.040          | 0.000        | 0.040         | 52                      | 0         | 0.040         | 0.040          | 0.000        | 0.040         | 0.080         |
| 1,1-Dichloroethene        | 282                     | 0         | 0.050         | 0.050          | 0.000        | 0.050         | 52                      | 0         | 0.050         | 0.050          | 0.000        | 0.050         | 0.100         |
| 1,2,4-Trichlorobenzene    | 282                     | 0         | 0.030         | 0.030          | 0.000        | 0.030         | 52                      | 0         | 0.030         | 0.030          | 0.000        | 0.030         | 0.060         |
| 1,2,4-Trimethylbenzene    | 282                     | 91        | 0.035         | 0.212          | 0.138        | 1.029         | 52                      | 85        | 0.035         | 0.195          | 0.146        | 0.854         | 0.070         |
| 1,2-Dibromoethane         | 282                     | 0         | 0.040         | 0.040          | 0.000        | 0.040         | 52                      | 0         | 0.040         | 0.040          | 0.000        | 0.040         | 0.080         |
| 1,2-Dichlorobenzene       | 282                     | 0         | 0.030         | 0.030          | 0.000        | 0.030         | 52                      | 0         | 0.030         | 0.030          | 0.000        | 0.030         | 0.060         |
| 1,2-Dichloroethane        | 282                     | 0         | 0.030         | 0.030          | 0.000        | 0.030         | 52                      | 0         | 0.030         | 0.030          | 0.000        | 0.030         | 0.060         |
| 1,2-Dichloropropane       | 282                     | 0         | 0.035         | 0.035          | 0.000        | 0.035         | 52                      | 0         | 0.035         | 0.035          | 0.000        | 0.035         | 0.070         |
| 1,3,5-Trimethylbenzene    | 282                     | 39        | 0.035         | 0.065          | 0.046        | 0.312         | 52                      | 38        | 0.035         | 0.081          | 0.125        | 0.900         | 0.070         |
| 1,3-Butadiene             | 282                     | 26        | 0.035         | 0.057          | 0.045        | 0.292         | 52                      | 27        | 0.035         | 0.060          | 0.045        | 0.209         | 0.070         |
| 1,3-Dichlorobenzene       | 282                     | 0         | 0.025         | 0.025          | 0.000        | 0.025         | 52                      | 0         | 0.025         | 0.025          | 0.000        | 0.025         | 0.050         |
| 1,4-Dichlorobenzene       | 282                     | 1         | 0.045         | 0.046          | 0.008        | 0.142         | 52                      | 6         | 0.045         | 0.049          | 0.016        | 0.130         | 0.090         |
| 2-Chloro-1,3-Butadiene    | 282                     | 0         | 0.050         | 0.050          | 0.000        | 0.050         | 52                      | 0         | 0.050         | 0.050          | 0.000        | 0.050         | 0.100         |
| Acetonitrile              | 282                     | 35        | 0.125         | 1.790          | 6.893        | 102.600       | 52                      | 38        | 0.125         | 2.093          | 3.671        | 14.080        | 0.250         |
| Acetylene                 | 282                     | 99        | 0.065         | 1.675          | 0.781        | 6.480         | 52                      | 100       | 0.690         | 1.767          | 0.892        | 4.460         | 0.130         |
| Acrylonitrile             | 282                     | 0         | 0.105         | 0.105          | 0.000        | 0.105         | 52                      | 0         | 0.105         | 0.105          | 0.000        | 0.105         | 0.210         |
| Benzene                   | 282                     | 100       | 0.231         | 0.615          | 0.316        | 2.173         | 52                      | 100       | 0.240         | 0.600          | 0.306        | 1.713         | 0.040         |
| Benzyl chloride           | 282                     | 0         | 0.035         | 0.035          | 0.000        | 0.035         | 52                      | 0         | 0.035         | 0.035          | 0.000        | 0.035         | 0.070         |
| Bromochloromethane        | 282                     | 0         | 0.060         | 0.060          | 0.000        | 0.060         | 52                      | 0         | 0.060         | 0.060          | 0.000        | 0.060         | 0.120         |
| Bromodichloromethane      | 282                     | 0         | 0.030         | 0.030          | 0.000        | 0.030         | 52                      | 0         | 0.030         | 0.030          | 0.000        | 0.030         | 0.060         |
| Bromoform                 | 282                     | 0         | 0.040         | 0.040          | 0.000        | 0.040         | 52                      | 2         | 0.040         | 0.054          | 0.101        | 0.770         | 0.080         |
| Bromomethane              | 282                     | 0         | 0.045         | 0.045          | 0.000        | 0.045         | 52                      | 0         | 0.045         | 0.045          | 0.000        | 0.045         | 0.090         |
| Carbon tetrachloride      | 282                     | 91        | 0.040         | 0.100          | 0.024        | 0.170         | 52                      | 88        | 0.040         | 0.096          | 0.024        | 0.140         | 0.080         |
| Chlorobenzene             | 282                     | 0         | 0.030         | 0.030          | 0.000        | 0.030         | 52                      | 0         | 0.030         | 0.030          | 0.000        | 0.030         | 0.060         |
| Chloroethane              | 282                     | 1         | 0.040         | 0.044          | 0.041        | 0.626         | 52                      | 6         | 0.040         | 0.044          | 0.017        | 0.120         | 0.080         |

## Supplement 1. (Cont.)

| Compound                   | ERG laboratory-Sample 1 |        |        |        |        |         | ERG laboratory-Sample 2 |        |        |        |        |        | MDL   |
|----------------------------|-------------------------|--------|--------|--------|--------|---------|-------------------------|--------|--------|--------|--------|--------|-------|
|                            | N                       | DF     | Min    | Mean   | SD     | Max     | N                       | DF     | Min    | Mean   | SD     | Max    |       |
|                            | (%)                     | (ppbv) | (ppbv) | (ppbv) | (ppbv) | (ppbv)  | (%)                     | (ppbv) | (ppbv) | (ppbv) | (ppbv) | (ppbv) |       |
| Chloroform                 | 282                     | 2      | 0.025  | 0.026  | 0.004  | 0.065   | 52                      | 0      | 0.025  | 0.025  | 0.000  | 0.025  | 0.050 |
| Chloromethane              | 282                     | 100    | 0.408  | 0.608  | 0.082  | 0.988   | 52                      | 100    | 0.480  | 0.600  | 0.098  | 1.190  | 0.060 |
| 2-Chloro-1,3-Butadiene     | 282                     | 0      | 0.050  | 0.050  | 0.000  | 0.050   | 52                      | 0      | 0.050  | 0.050  | 0.000  | 0.050  | 0.100 |
| cis-1,2-Dichloroethylene   | 282                     | 0      | 0.050  | 0.051  | 0.019  | 0.370   | 52                      | 0      | 0.050  | 0.050  | 0.000  | 0.050  | 0.100 |
| cis-1,3-Dichloroprene      | 282                     | 0      | 0.050  | 0.050  | 0.000  | 0.050   | 52                      | 0      | 0.050  | 0.050  | 0.000  | 0.050  | 0.100 |
| Dibromochloromethane       | 282                     | 0      | 0.040  | 0.040  | 0.000  | 0.040   | 52                      | 0      | 0.040  | 0.040  | 0.000  | 0.040  | 0.080 |
| Dichlorodifluoromethane    | 282                     | 100    | 0.460  | 0.634  | 0.079  | 1.079   | 52                      | 100    | 0.520  | 0.619  | 0.043  | 0.712  | 0.040 |
| Dichlorotetrafluoroethane  | 282                     | 0      | 0.025  | 0.025  | 0.000  | 0.025   | 52                      | 0      | 0.025  | 0.025  | 0.000  | 0.025  | 0.050 |
| Ethyl acrylate             | 282                     | 0      | 0.080  | 0.080  | 0.000  | 0.080   | 52                      | 0      | 0.080  | 0.080  | 0.000  | 0.080  | 0.160 |
| Ethylbenzene               | 282                     | 98     | 0.020  | 0.192  | 0.157  | 1.894   | 52                      | 90     | 0.020  | 0.168  | 0.122  | 0.647  | 0.040 |
| Ethyl-tert-butyl-ether     | 282                     | 0      | 0.075  | 0.075  | 0.000  | 0.075   | 52                      | 0      | 0.075  | 0.075  | 0.000  | 0.075  | 0.150 |
| Hexachloro-1,3-Butadiene   | 282                     | 0      | 0.030  | 0.030  | 0.000  | 0.030   | 52                      | 0      | 0.030  | 0.030  | 0.000  | 0.030  | 0.060 |
| m,p-Xylene                 | 282                     | 100    | 0.100  | 0.551  | 0.482  | 6.082   | 52                      | 98     | 0.025  | 0.489  | 0.375  | 1.893  | 0.050 |
| Methyl ethyl ketone        | 282                     | 72     | 0.075  | 0.604  | 0.510  | 2.920   | 52                      | 73     | 0.075  | 0.601  | 0.446  | 1.761  | 0.150 |
| Methyl isobutyl ketone     | 282                     | 9      | 0.075  | 0.102  | 0.098  | 0.736   | 52                      | 12     | 0.075  | 0.102  | 0.086  | 0.585  | 0.150 |
| Methyl methacrylate        | 282                     | 0      | 0.090  | 0.090  | 0.000  | 0.090   | 52                      | 0      | 0.090  | 0.090  | 0.000  | 0.090  | 0.180 |
| Methylene chloride         | 282                     | 96     | 0.030  | 3.720  | 11.711 | 147.770 | 52                      | 98     | 0.030  | 1.488  | 3.006  | 16.990 | 0.060 |
| Methyl-tert-butyl-ether    | 282                     | 6      | 0.090  | 0.102  | 0.056  | 0.585   | 52                      | 8      | 0.090  | 0.109  | 0.073  | 0.484  | 0.180 |
| n-Octane                   | 282                     | 32     | 0.030  | 0.055  | 0.058  | 0.750   | 52                      | 46     | 0.030  | 0.072  | 0.064  | 0.310  | 0.060 |
| o-Xylene                   | 282                     | 98     | 0.025  | 0.220  | 0.188  | 2.502   | 52                      | 90     | 0.025  | 0.204  | 0.166  | 0.899  | 0.050 |
| Propylene                  | 282                     | 100    | 0.110  | 1.210  | 1.474  | 14.137  | 52                      | 100    | 0.180  | 1.248  | 1.842  | 11.490 | 0.050 |
| Styrene                    | 282                     | 7      | 0.035  | 0.039  | 0.017  | 0.173   | 52                      | 4      | 0.035  | 0.037  | 0.011  | 0.093  | 0.070 |
| Tert-amyl-methyl-ether     | 282                     | 0      | 0.060  | 0.060  | 0.000  | 0.060   | 52                      | 0      | 0.060  | 0.060  | 0.000  | 0.060  | 0.120 |
| Tetrachloroethylene        | 282                     | 34     | 0.030  | 0.064  | 0.080  | 0.670   | 52                      | 35     | 0.030  | 0.053  | 0.037  | 0.160  | 0.060 |
| Toluene                    | 282                     | 100    | 0.250  | 1.112  | 1.099  | 13.428  | 52                      | 100    | 0.210  | 1.057  | 0.929  | 6.431  | 0.060 |
| trans-1,2-Dichloroethylene | 282                     | 0      | 0.030  | 0.030  | 0.004  | 0.090   | 52                      | 0      | 0.030  | 0.030  | 0.000  | 0.030  | 0.060 |
| trans-1,3-Dichloropropene  | 282                     | 0      | 0.055  | 0.055  | 0.000  | 0.055   | 52                      | 0      | 0.055  | 0.055  | 0.000  | 0.055  | 0.110 |
| Trichloroethylene          | 282                     | 1      | 0.035  | 0.043  | 0.085  | 1.268   | 52                      | 4      | 0.035  | 0.329  | 2.099  | 15.172 | 0.070 |
| Trichlorofluoromethane     | 282                     | 100    | 0.020  | 0.321  | 0.120  | 1.540   | 52                      | 100    | 0.190  | 0.299  | 0.052  | 0.497  | 0.040 |
| Trichlorotrifluoroethane   | 282                     | 100    | 0.035  | 0.111  | 0.024  | 0.194   | 52                      | 100    | 0.080  | 0.108  | 0.021  | 0.150  | 0.070 |
| Vinyl chloride             | 282                     | 0      | 0.030  | 0.030  | 0.000  | 0.030   | 52                      | 0      | 0.030  | 0.030  | 0.000  | 0.030  | 0.060 |

Supplement 2. Statistics of concentrations at Dearborn, Michigan for VOCs and carbonyls analyzed by Michigan Department of Environmental Quality (MDEQ) laboratory.

TFE=trifluoroethane; TTFE=tetrafluoroethane; DF=detection frequency; MDL=method detection limit.

| Compound                  | MDEQ laboratory-Sample 1 |        |            |             |           |            | MDEQ laboratory-Sample 2 |        |            |             |           |            | MDL   |
|---------------------------|--------------------------|--------|------------|-------------|-----------|------------|--------------------------|--------|------------|-------------|-----------|------------|-------|
|                           | N                        | DF (%) | Min (ppbv) | Mean (ppbv) | SD (ppbv) | Max (ppbv) | N                        | DF (%) | Min (ppbv) | Mean (ppbv) | SD (ppbv) | Max (ppbv) |       |
| <b>Carbonyls</b>          |                          |        |            |             |           |            |                          |        |            |             |           |            |       |
| 2,5-Dimethylbenzaldehyde  | 54                       | 2      | 0.002      | 0.005       | 0.028     | 0.210      | 59                       | 2      | 0.002      | 0.005       | 0.028     | 0.210      | 0.003 |
| Acetaldehyde              | 54                       | 89     | 0.005      | 1.005       | 1.207     | 6.721      | 59                       | 98     | 0.005      | 1.005       | 1.207     | 6.721      | 0.009 |
| Acetone                   | 54                       | 94     | 0.005      | 1.150       | 1.164     | 5.204      | 59                       | 98     | 0.005      | 1.150       | 1.164     | 5.204      | 0.011 |
| Benzaldehyde              | 54                       | 72     | 0.002      | 0.042       | 0.085     | 0.509      | 59                       | 56     | 0.002      | 0.042       | 0.085     | 0.509      | 0.004 |
| Crotonaldehyde            | 54                       | 24     | 0.004      | 0.016       | 0.030     | 0.139      | 59                       | 14     | 0.004      | 0.016       | 0.030     | 0.139      | 0.008 |
| Formaldehyde              | 54                       | 91     | 0.004      | 2.046       | 1.689     | 8.735      | 59                       | 97     | 0.004      | 2.046       | 1.689     | 8.735      | 0.008 |
| Hexaldehyde               | 54                       | 69     | 0.003      | 0.098       | 0.205     | 1.191      | 59                       | 71     | 0.003      | 0.098       | 0.205     | 1.191      | 0.005 |
| iso-Valeraldehyde         | 54                       | 46     | 0.006      | 0.064       | 0.105     | 0.525      | 59                       | 61     | 0.006      | 0.064       | 0.105     | 0.525      | 0.012 |
| m,p-Tolualdehyde          | 54                       | 31     | 0.001      | 0.017       | 0.033     | 0.161      | 59                       | 29     | 0.001      | 0.017       | 0.033     | 0.161      | 0.002 |
| n-Butyraldehyde           | 54                       | 81     | 0.003      | 0.127       | 0.228     | 1.274      | 59                       | 88     | 0.003      | 0.127       | 0.228     | 1.274      | 0.007 |
| o-Tolualdehyde            | 54                       | 4      | 0.001      | 0.002       | 0.003     | 0.020      | 59                       | 0      | 0.001      | 0.002       | 0.003     | 0.020      | 0.002 |
| Propionaldehyde           | 54                       | 63     | 0.041      | 0.207       | 0.246     | 1.056      | 59                       | 75     | 0.041      | 0.207       | 0.246     | 1.056      | 0.083 |
| Valeraldehyde             | 54                       | 31     | 0.011      | 0.053       | 0.096     | 0.519      | 59                       | 34     | 0.011      | 0.053       | 0.096     | 0.519      | 0.022 |
| <b>VOCs</b>               |                          |        |            |             |           |            |                          |        |            |             |           |            |       |
| 1,1,1-Trichloroethane     | 57                       | 5      | 0.024      | 0.026       | 0.007     | 0.057      | 58                       | 2      | 0.024      | 0.026       | 0.007     | 0.057      | 0.048 |
| 1,1,2,2-Tetrachloroethane | 57                       | 0      | 0.041      | 0.041       | 0.000     | 0.041      | 58                       | 0      | 0.041      | 0.041       | 0.000     | 0.041      | 0.081 |
| 1,1,2-Trichloro-1,2,2-TFE | 57                       | 95     | 0.017      | 0.083       | 0.023     | 0.178      | 58                       | 95     | 0.017      | 0.083       | 0.023     | 0.178      | 0.034 |
| 1,1,2-Trichloroethane     | 57                       | 0      | 0.024      | 0.024       | 0.000     | 0.024      | 58                       | 0      | 0.024      | 0.024       | 0.000     | 0.024      | 0.048 |
| 1,1-Dichloroethane        | 57                       | 0      | 0.045      | 0.045       | 0.000     | 0.045      | 58                       | 0      | 0.045      | 0.045       | 0.000     | 0.045      | 0.089 |
| 1,1-Dichloroethene        | 57                       | 0      | 0.023      | 0.023       | 0.000     | 0.023      | 58                       | 2      | 0.023      | 0.023       | 0.000     | 0.023      | 0.046 |
| 1,2,4-Trichlorobenzene    | 57                       | 2      | 0.041      | 0.042       | 0.009     | 0.110      | 58                       | 0      | 0.041      | 0.042       | 0.009     | 0.110      | 0.081 |
| 1,2,4-Trimethylbenzene    | 57                       | 86     | 0.031      | 0.174       | 0.122     | 0.589      | 58                       | 83     | 0.031      | 0.174       | 0.122     | 0.589      | 0.062 |
| 1,2-Dibromoethane         | 57                       | 0      | 0.027      | 0.027       | 0.000     | 0.027      | 58                       | 0      | 0.027      | 0.027       | 0.000     | 0.027      | 0.054 |
| 1,2-Dichloro-1,1,2,2-TTFE | 57                       | 0      | 0.021      | 0.021       | 0.000     | 0.021      | 58                       | 0      | 0.021      | 0.021       | 0.000     | 0.021      | 0.042 |
| 1,2-Dichlorobenzene       | 57                       | 2      | 0.033      | 0.034       | 0.007     | 0.085      | 58                       | 0      | 0.033      | 0.034       | 0.007     | 0.085      | 0.066 |
| 1,2-Dichloroethane        | 57                       | 0      | 0.043      | 0.043       | 0.000     | 0.043      | 58                       | 0      | 0.043      | 0.043       | 0.000     | 0.043      | 0.086 |
| 1,2-Dichloropropane       | 57                       | 0      | 0.030      | 0.030       | 0.000     | 0.030      | 58                       | 0      | 0.030      | 0.030       | 0.000     | 0.030      | 0.059 |
| 1,3,5-Trimethylbenzene    | 57                       | 30     | 0.029      | 0.047       | 0.034     | 0.161      | 58                       | 28     | 0.029      | 0.047       | 0.034     | 0.161      | 0.057 |
| 1,3-Butadiene             | 57                       | 0      | 0.020      | 0.020       | 0.000     | 0.020      | 58                       | 2      | 0.020      | 0.020       | 0.000     | 0.020      | 0.040 |
| 1,3-Dichlorobenzene       | 57                       | 2      | 0.027      | 0.027       | 0.007     | 0.079      | 58                       | 0      | 0.027      | 0.027       | 0.007     | 0.079      | 0.053 |
| 1,4-Dichlorobenzene       | 57                       | 7      | 0.027      | 0.030       | 0.015     | 0.106      | 58                       | 7      | 0.027      | 0.030       | 0.015     | 0.106      | 0.053 |
| 2,2,4-Trimethylpentane    | 57                       | 96     | 0.009      | 0.118       | 0.085     | 0.523      | 58                       | 98     | 0.009      | 0.118       | 0.085     | 0.523      | 0.017 |
| 2-Chloro-1,3-Butadiene    | 57                       | 0      | 0.015      | 0.015       | 0.000     | 0.015      | 58                       | 0      | 0.015      | 0.015       | 0.000     | 0.015      | 0.030 |
| Acetonitrile              | 57                       | 70     | 0.260      | 1.563       | 2.773     | 15.530     | 58                       | 74     | 0.260      | 1.563       | 2.773     | 15.530     | 0.520 |
| Acrylonitrile             | 57                       | 0      | 0.195      | 0.195       | 0.000     | 0.195      | 58                       | 0      | 0.195      | 0.195       | 0.000     | 0.195      | 0.390 |
| Benzene                   | 57                       | 96     | 0.035      | 0.546       | 0.397     | 2.494      | 58                       | 100    | 0.035      | 0.546       | 0.397     | 2.494      | 0.070 |
| Benzyl chloride           | 57                       | 0      | 0.038      | 0.038       | 0.000     | 0.038      | 58                       | 0      | 0.038      | 0.038       | 0.000     | 0.038      | 0.076 |
| Bromodichloromethane      | 57                       | 0      | 0.037      | 0.037       | 0.000     | 0.037      | 58                       | 0      | 0.037      | 0.037       | 0.000     | 0.037      | 0.073 |
| Bromoform                 | 57                       | 0      | 0.030      | 0.030       | 0.000     | 0.030      | 58                       | 0      | 0.030      | 0.030       | 0.000     | 0.030      | 0.059 |
| Bromomethane              | 57                       | 4      | 0.020      | 0.022       | 0.010     | 0.092      | 58                       | 0      | 0.020      | 0.022       | 0.010     | 0.092      | 0.040 |

Supplement 2. (Cont.)

| Compound                   | MDEQ laboratory-Sample 1 |        |        |        |        |        | MDEQ laboratory-Sample 2 |        |        |        |        |        | MDL   |
|----------------------------|--------------------------|--------|--------|--------|--------|--------|--------------------------|--------|--------|--------|--------|--------|-------|
|                            | N                        | DF     | Min    | Mean   | SD     | Max    | N                        | DF     | Min    | Mean   | SD     | Max    |       |
|                            | (%)                      | (ppbv) | (ppbv) | (ppbv) | (ppbv) | (ppbv) | (%)                      | (ppbv) | (ppbv) | (ppbv) | (ppbv) | (ppbv) |       |
| Carbon tetrachloride       | 57                       | 95     | 0.019  | 0.090  | 0.020  | 0.125  | 58                       | 95     | 0.019  | 0.090  | 0.020  | 0.125  | 0.038 |
| Chlorobenzene              | 57                       | 2      | 0.020  | 0.021  | 0.004  | 0.049  | 58                       | 2      | 0.020  | 0.021  | 0.004  | 0.049  | 0.040 |
| Chloroethane               | 57                       | 0      | 0.020  | 0.020  | 0.000  | 0.020  | 58                       | 17     | 0.020  | 0.020  | 0.000  | 0.020  | 0.040 |
| Chloroform                 | 57                       | 0      | 0.034  | 0.034  | 0.000  | 0.034  | 58                       | 0      | 0.034  | 0.034  | 0.000  | 0.034  | 0.068 |
| Chloromethane              | 57                       | 98     | 0.031  | 0.568  | 0.169  | 1.426  | 58                       | 100    | 0.031  | 0.568  | 0.169  | 1.426  | 0.062 |
| 2-Chloro-1,3-Butadiene     | 57                       | 0      | 0.015  | 0.015  | 0.000  | 0.015  | 58                       | 0      | 0.015  | 0.015  | 0.000  | 0.015  | 0.030 |
| cis-1,2-Dichloroethylene   | 57                       | 0      | 0.029  | 0.029  | 0.000  | 0.029  | 58                       | 0      | 0.029  | 0.029  | 0.000  | 0.029  | 0.057 |
| cis-1,3-Dichloroprene      | 57                       | 0      | 0.027  | 0.027  | 0.000  | 0.027  | 58                       | 0      | 0.027  | 0.027  | 0.000  | 0.027  | 0.054 |
| Dibromochloromethane       | 57                       | 0      | 0.030  | 0.030  | 0.000  | 0.030  | 58                       | 0      | 0.030  | 0.030  | 0.000  | 0.030  | 0.059 |
| Dichlorodifluoromethane    | 57                       | 98     | 0.024  | 0.554  | 0.129  | 0.846  | 58                       | 100    | 0.024  | 0.554  | 0.129  | 0.846  | 0.048 |
| Ethylbenzene               | 57                       | 68     | 0.042  | 0.118  | 0.086  | 0.413  | 58                       | 48     | 0.042  | 0.118  | 0.086  | 0.413  | 0.083 |
| Hexachloro-1,3-Butadiene   | 57                       | 0      | 0.032  | 0.032  | 0.000  | 0.032  | 58                       | 0      | 0.032  | 0.032  | 0.000  | 0.032  | 0.063 |
| Hexane                     | 57                       | 21     | 0.250  | 0.427  | 0.482  | 3.318  | 58                       | 22     | 0.250  | 0.427  | 0.482  | 3.318  | 0.500 |
| m,p-Xylene                 | 57                       | 70     | 0.100  | 0.319  | 0.244  | 1.198  | 58                       | 53     | 0.100  | 0.319  | 0.244  | 1.198  | 0.200 |
| Methyl ethyl ketone        | 57                       | 0      | 0.850  | 0.850  | 0.000  | 0.850  | 58                       | 0      | 0.850  | 0.850  | 0.000  | 0.850  | 1.700 |
| Methyl isobutyl ketone     | 57                       | 0      | 0.420  | 0.420  | 0.000  | 0.420  | 58                       | 0      | 0.420  | 0.420  | 0.000  | 0.420  | 0.840 |
| Methylene chloride         | 57                       | 82     | 0.115  | 1.621  | 3.545  | 22.196 | 58                       | 81     | 0.115  | 1.621  | 3.545  | 22.196 | 0.230 |
| Methyl-tert-butyl-ether    | 57                       | 5      | 0.031  | 0.040  | 0.044  | 0.292  | 58                       | 3      | 0.031  | 0.040  | 0.044  | 0.292  | 0.061 |
| o-Xylene                   | 57                       | 89     | 0.022  | 0.139  | 0.098  | 0.487  | 58                       | 88     | 0.022  | 0.139  | 0.098  | 0.487  | 0.043 |
| Styrene                    | 57                       | 7      | 0.027  | 0.031  | 0.016  | 0.132  | 58                       | 5      | 0.027  | 0.031  | 0.016  | 0.132  | 0.054 |
| Tertrachloroethylene       | 57                       | 33     | 0.036  | 0.064  | 0.053  | 0.343  | 58                       | 22     | 0.036  | 0.064  | 0.053  | 0.343  | 0.071 |
| Toluene                    | 57                       | 98     | 0.035  | 0.932  | 0.685  | 3.473  | 58                       | 100    | 0.035  | 0.932  | 0.685  | 3.473  | 0.070 |
| trans-1,2-Dichloroethylene | 57                       | 0      | 0.043  | 0.043  | 0.000  | 0.043  | 58                       | 0      | 0.043  | 0.043  | 0.000  | 0.043  | 0.087 |
| trans-1,3-Dichloropropene  | 57                       | 0      | 0.031  | 0.031  | 0.000  | 0.031  | 58                       | 0      | 0.031  | 0.031  | 0.000  | 0.031  | 0.062 |
| Trichloroethylene          | 57                       | 7      | 0.019  | 0.022  | 0.012  | 0.084  | 58                       | 3      | 0.019  | 0.022  | 0.012  | 0.084  | 0.038 |
| Trichlorofluoromethane     | 57                       | 96     | 0.024  | 0.273  | 0.073  | 0.500  | 58                       | 100    | 0.024  | 0.273  | 0.073  | 0.500  | 0.048 |
| Vinyl chloride             | 57                       | 0      | 0.022  | 0.022  | 0.000  | 0.022  | 58                       | 0      | 0.022  | 0.022  | 0.000  | 0.022  | 0.044 |

Supplement 3. Outlier analysis using Gumbel distribution (type I). ERG= Eastern Research Group; MDEQ= Michigan Department of Environmental Quality.

| Compound                | Date       | Concentration<br>(ppbv) | Laboratory | Sample |
|-------------------------|------------|-------------------------|------------|--------|
| <b><i>Carbonyls</i></b> |            |                         |            |        |
| Formaldehyde            | 4/12/2002  | 20.98                   | ERG        | 1      |
| Hexaldehyde             | 8/5/2001   | 1.19                    | MDEQ       | 1      |
| Tolualdehyde            | 7/29/2001  | 0.59                    | ERG        | 1      |
| <b><i>VOCs</i></b>      |            |                         |            |        |
| Propylene               | 10/10/2001 | 14.14                   | ERG        | 1      |
|                         | 10/31/2001 | 11.49                   | ERG        | 1      |
| n-Octane                | 3/11/2002  | 0.75                    | ERG        | 1      |
| Methylene chloride      | 7/2/2001   | 61.71                   | ERG        | 1      |
|                         | 7/13/2001  | 61.41                   | ERG        | 1      |
|                         | 7/18/2001  | 199.27                  | MDEQ       | 2      |
|                         | 2/25/2002  | 51.19                   | ERG        | 1      |
|                         | 3/3/2002   | 147.77                  | ERG        | 1      |
| m,p-Xylene              | 9/17/2001  | 6.08                    | ERG        | 1      |
|                         | 3/11/2002  | 3.49                    | ERG        | 1      |
| Ethylbenzene            | 9/17/2001  | 1.89                    | ERG        | 1      |
|                         | 3/11/2002  | 1.26                    | ERG        | 1      |
| o-Xylene                | 9/17/2001  | 2.50                    | ERG        | 1      |
| 1,3,5-Trimethylbenzene  | 8/20/2001  | 0.90                    | ERG        | 2      |
| Toluene                 | 5/20/2001  | 13.43                   | ERG        | 1      |
|                         | 9/17/2001  | 8.70                    | ERG        | 1      |

Supplement 4. Log-normal distribution plots for carbonyls and VOCs concentrations with detection frequencies above 20% from Eastern Research Group laboratory. Duplicates were averaged; Outliers were excluded.

a. **Carbonyls**

2,5-Dimethylbenzaldehyde

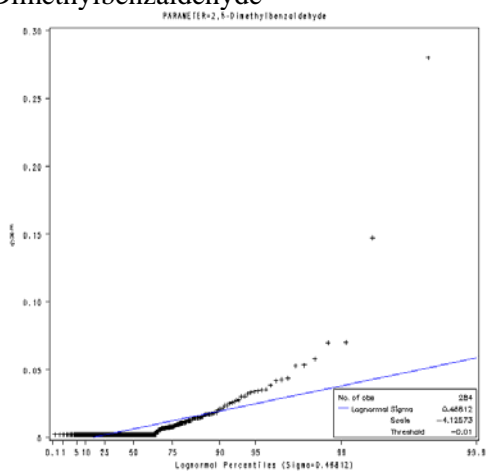

Acetaldehyde

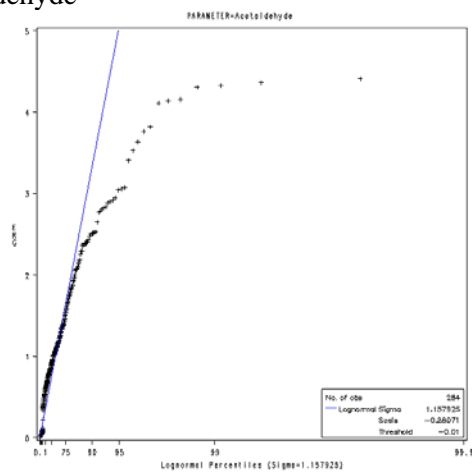

Benzaldehyde

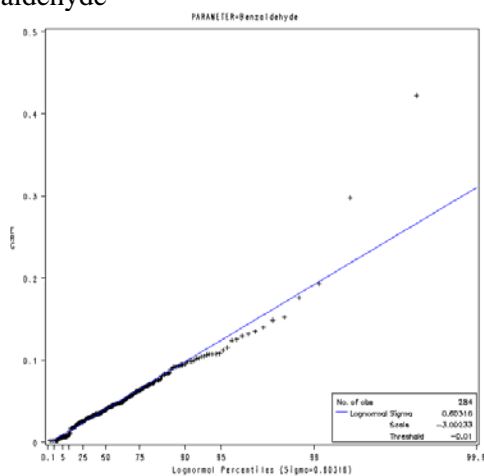

Crotonaldehyde

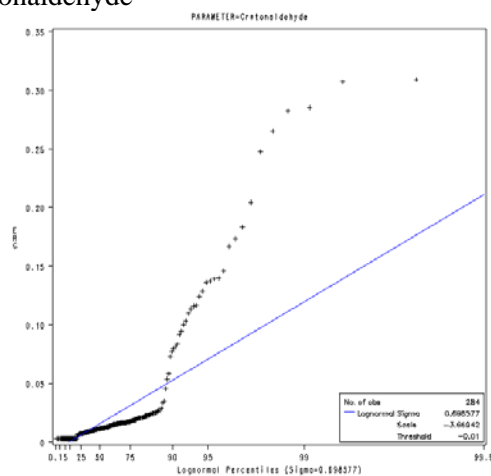

Formaldehyde

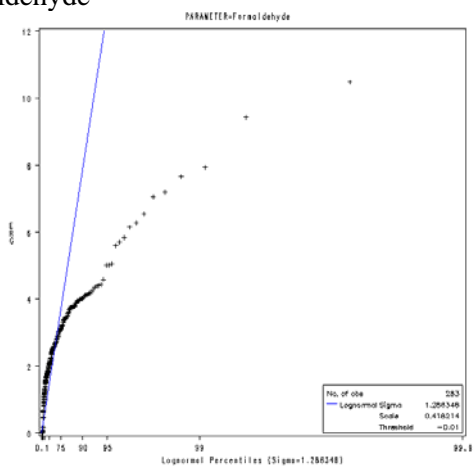

Hexaldehyde

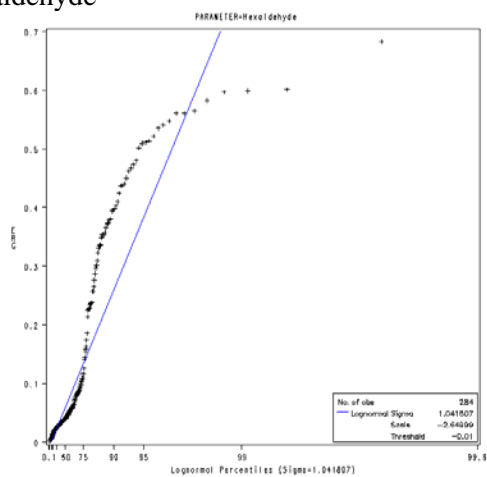

## Carbonyls (Cont.)

### iso-Butyraldehyde

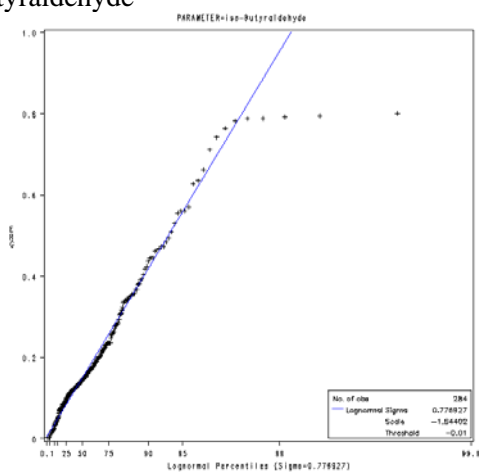

### iso-Valeraldehyde

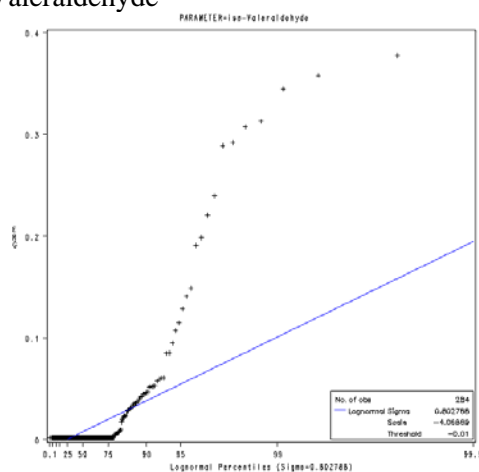

### Propionaldehyde

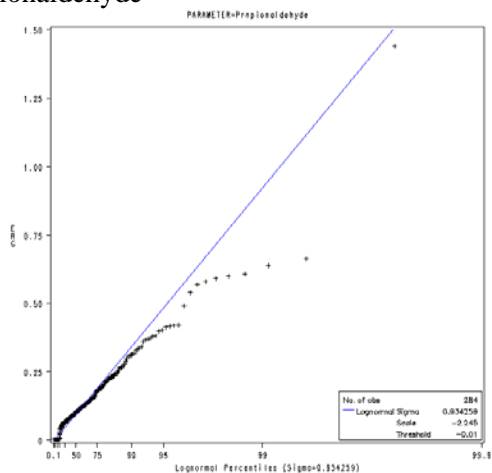

### Tolualdehyde

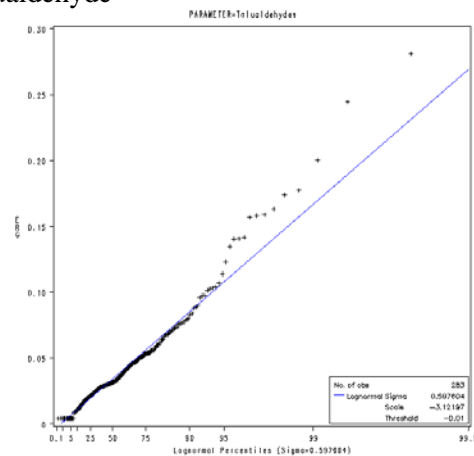

### Valeraldehyde

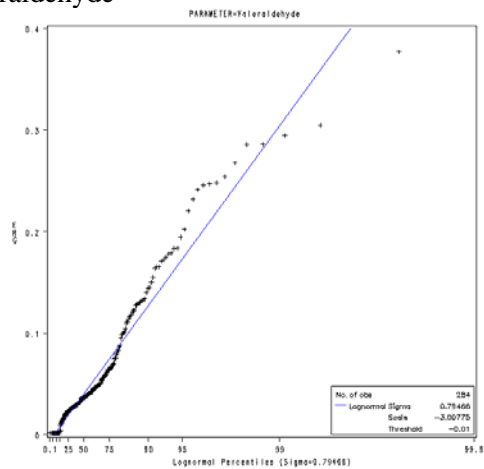



b. VOCs

1,2,4-Trimethylbenzene

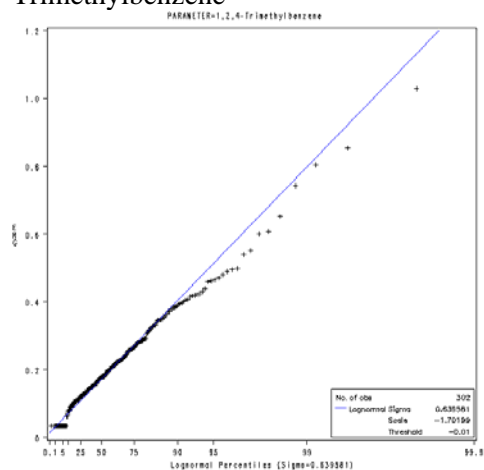

1,3,5-Trimethylbenzene

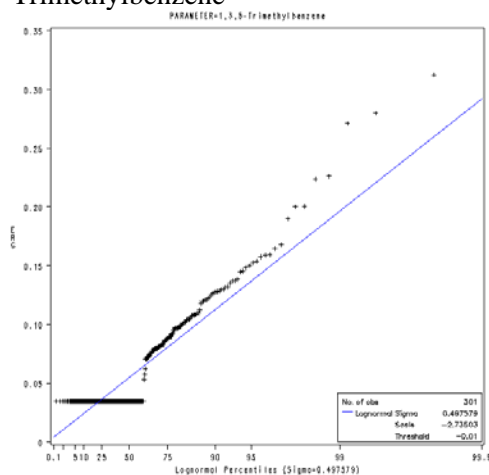

1,3-Butadiene

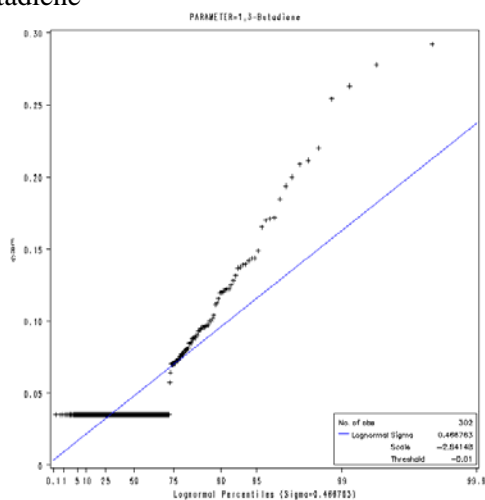

Acetone

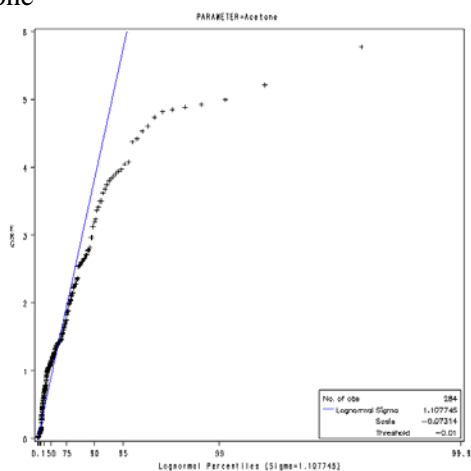

Acetonitrile

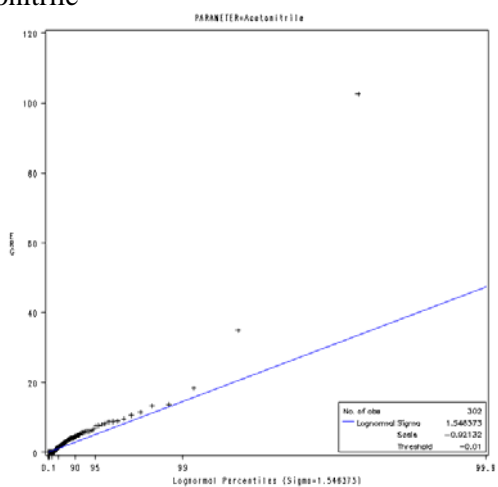

Acetylene

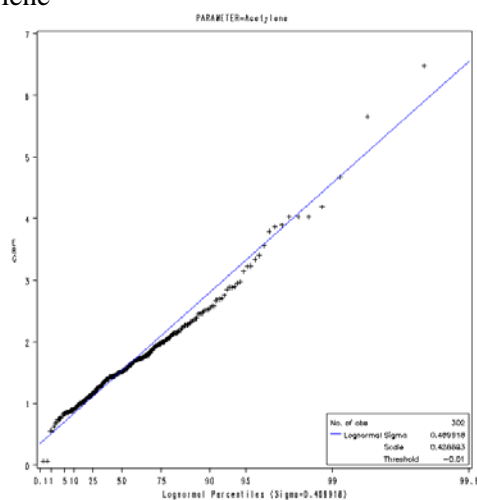

VOCs (Cont.)

Benzene

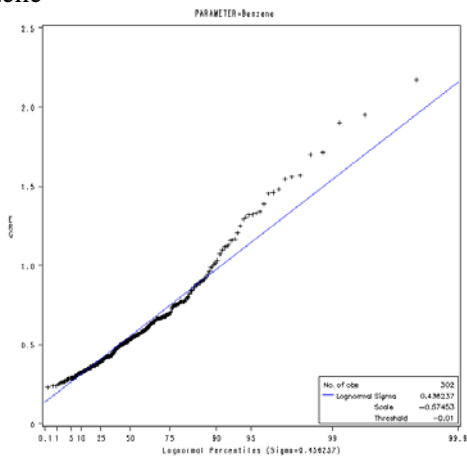

Carbon tetrachloride

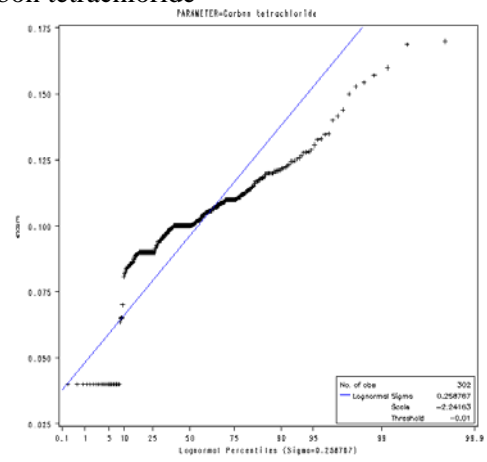

Chloromethane

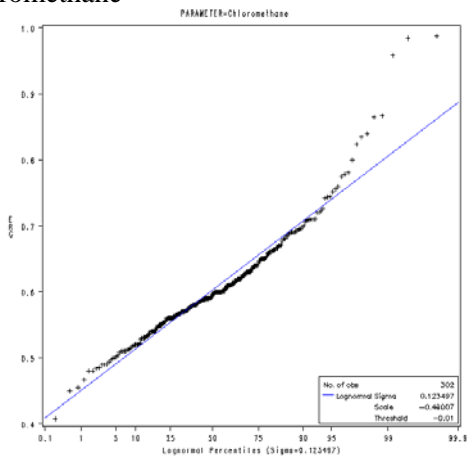

Dichlorodifluoromethane

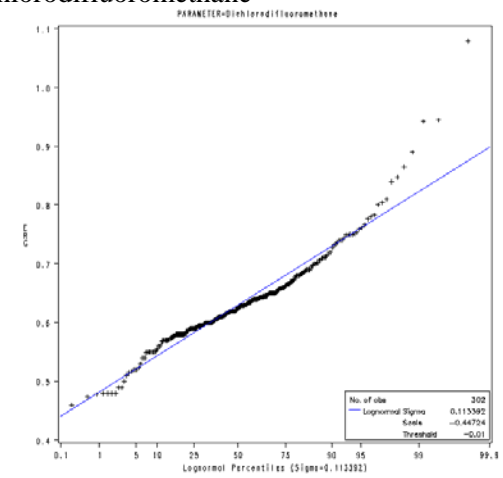

Ethylbenzene

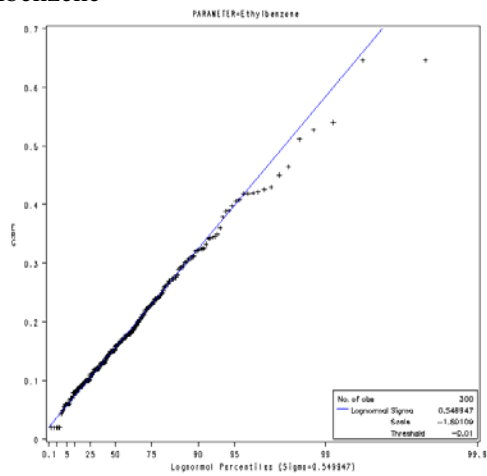

m,p-Xylene

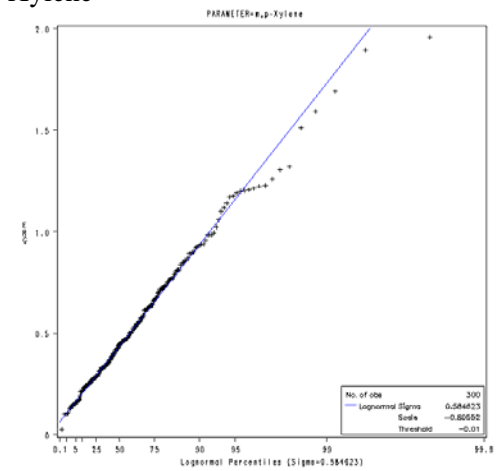

# VOCs (Cont.)

## Methyl ethyl ketone

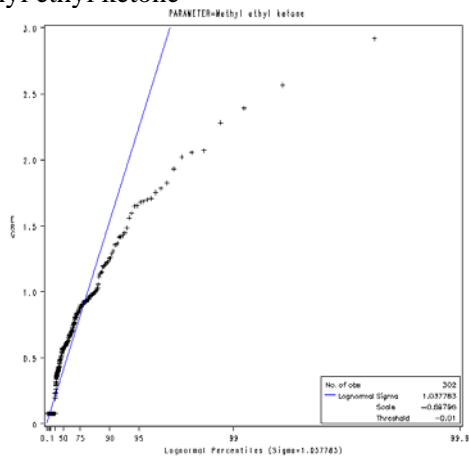

## Methylene chloride

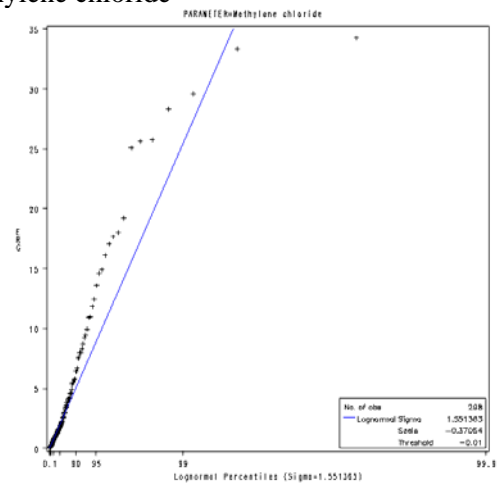

## n-Octane

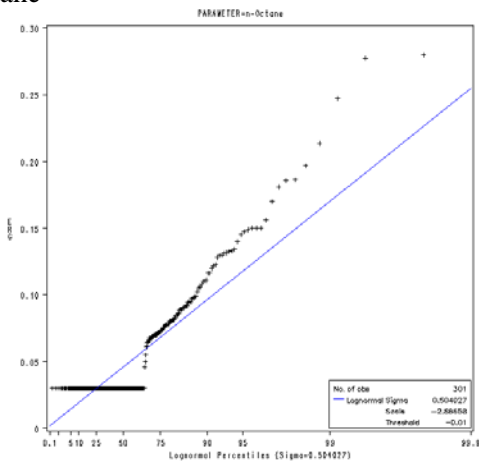

## o-Xylene

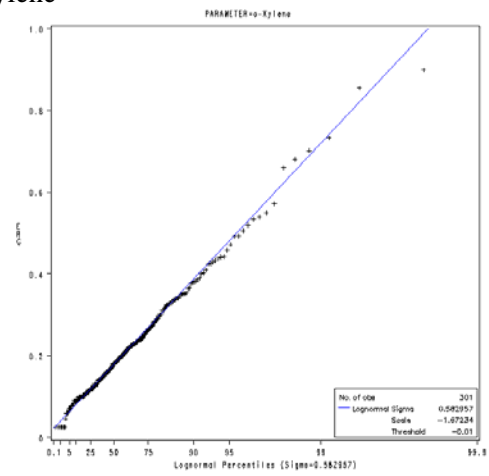

## Propylene

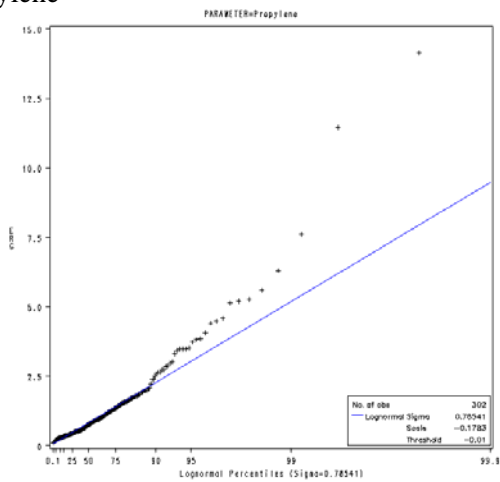

## Tetrachloroethylene

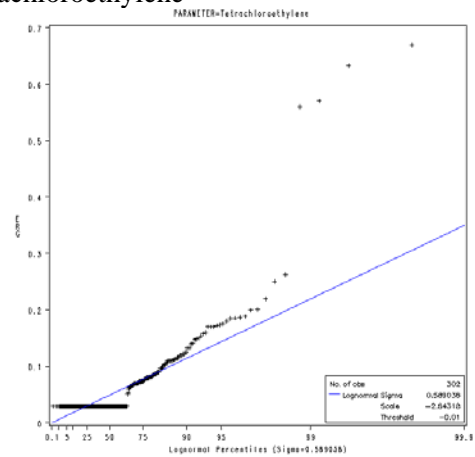

## VOCs (Cont.)

### Toluene

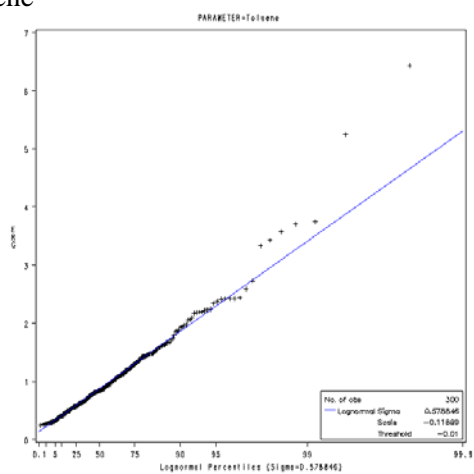

### Trichlorofluoromethane

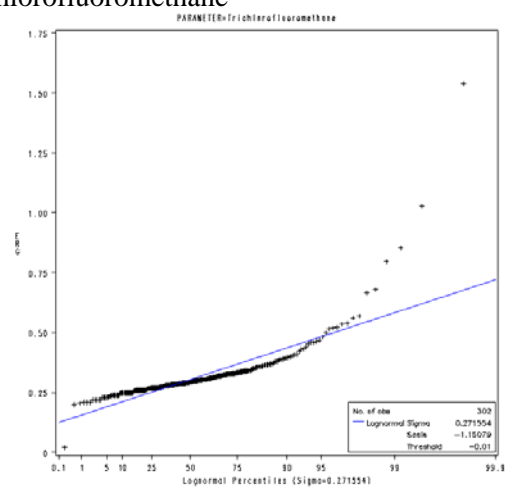

### Trichlorotrifluoroethene

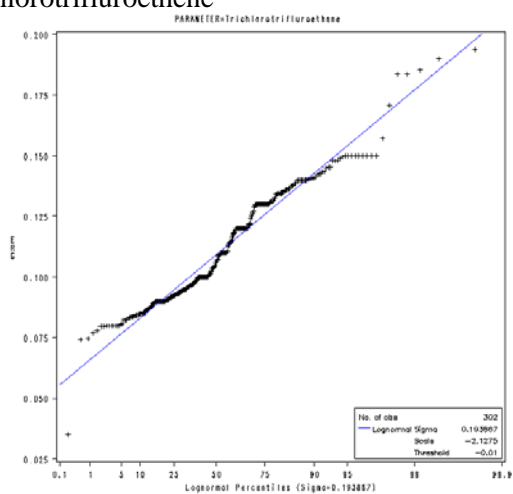

Supplement 5. Log-normal distribution plots for carbonyls and VOCs concentrations with detection frequencies above 20% from Michigan Department of Environmental Quality laboratory.

Duplicates were averaged; Outliers were excluded.

a. Carbonyls

Acetaldehyde

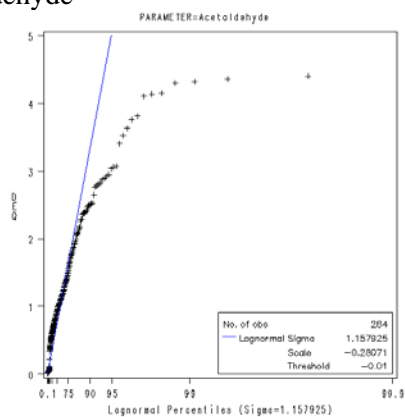

Benzaldehyde

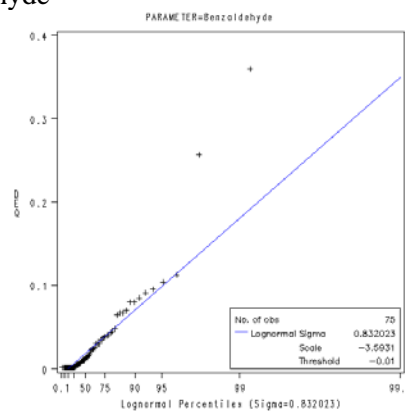

Crotonaldehyde

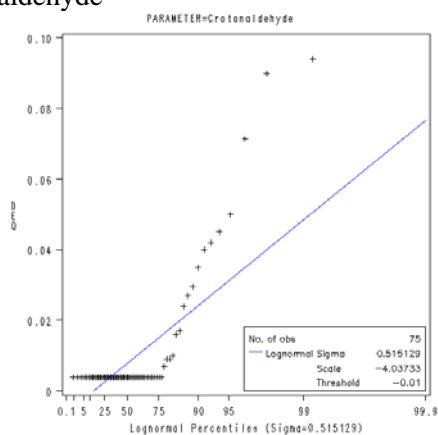

Formaldehyde

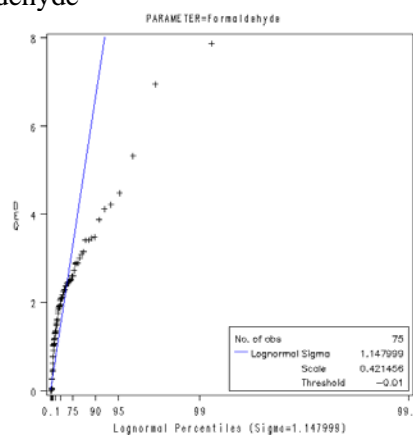

Hexaldehyde

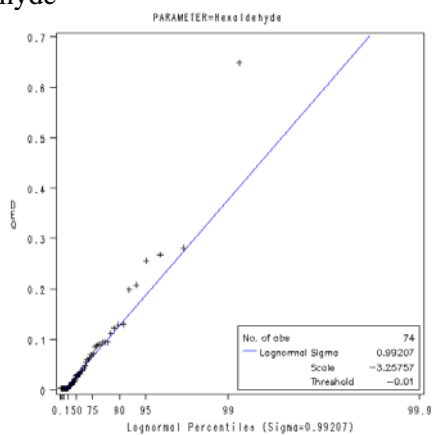

iso-Valeraldehyde

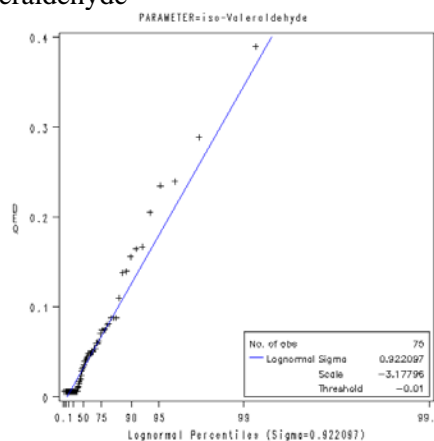

# Carbonyls (Cont.)

## m,p-Tolualdehyde

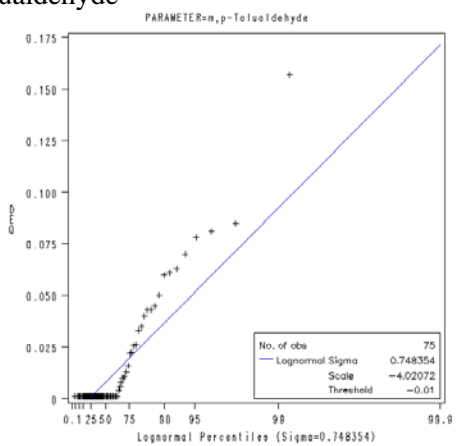

## n-Butyraldehyde

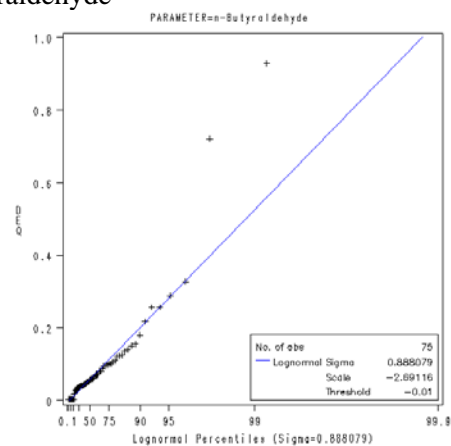

## Propionaldehyde

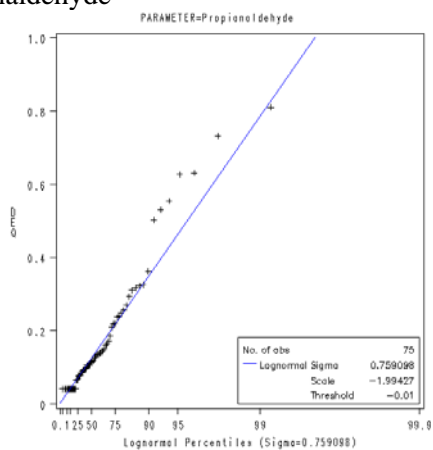

## Valeraldehyde

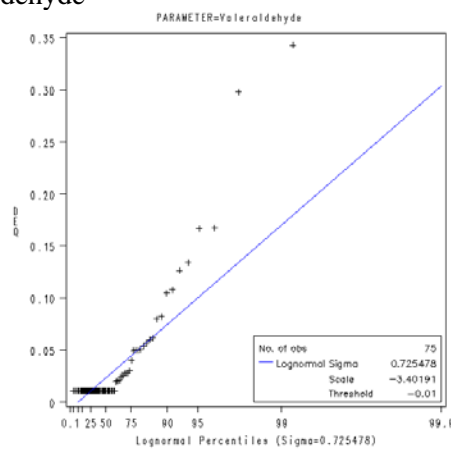

b. VOCs

1,1,2-Trichloro-1,2,2-trifluoroethane

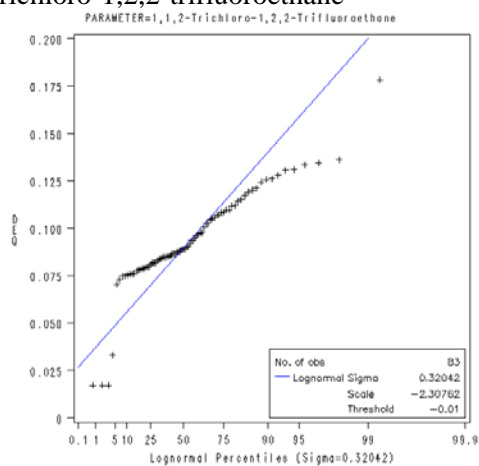

1,2,4-Trimethylbenzene

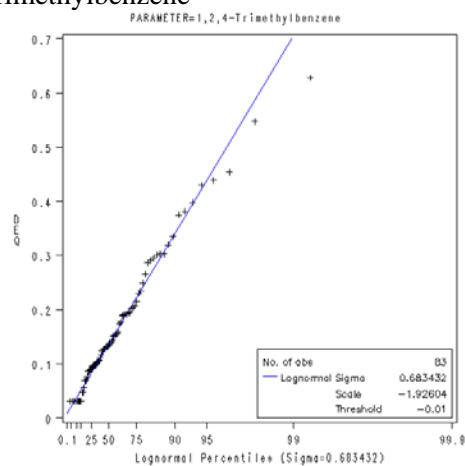

1,3,5-Trimethylbenzene

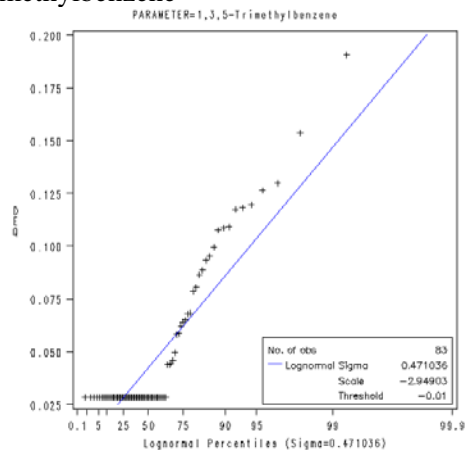

2,2,4-Trimethylpentane

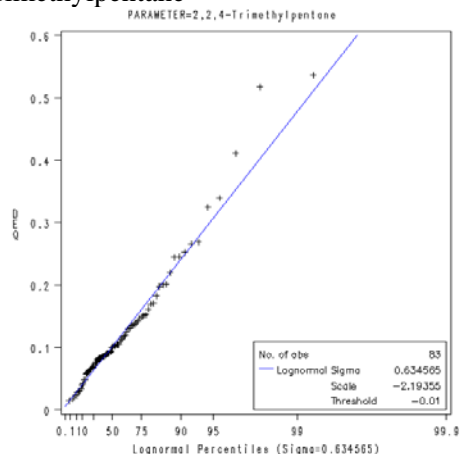

Acetone

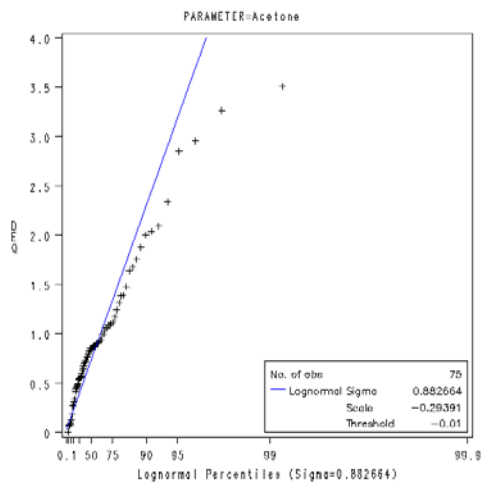

Acetonitrile

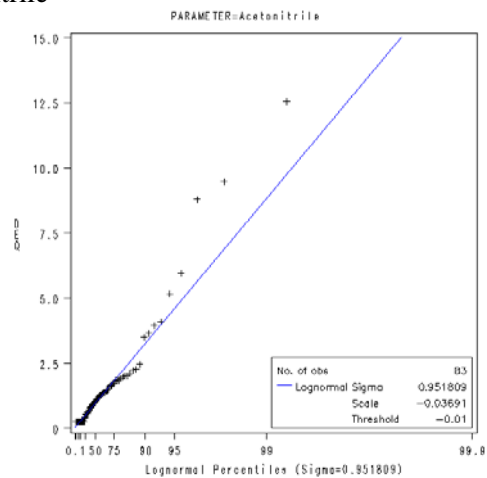

# VOCs (Cont.)

## Benzene

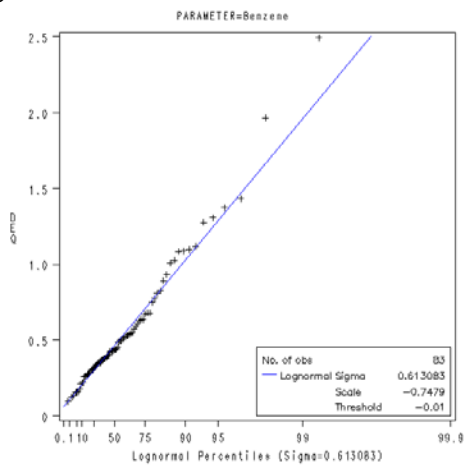

## Carbon tetrachloride

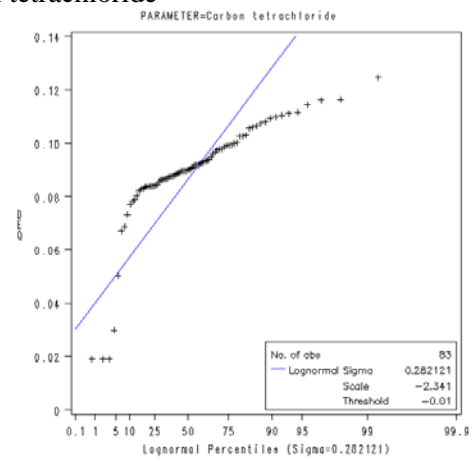

## Chloromethane

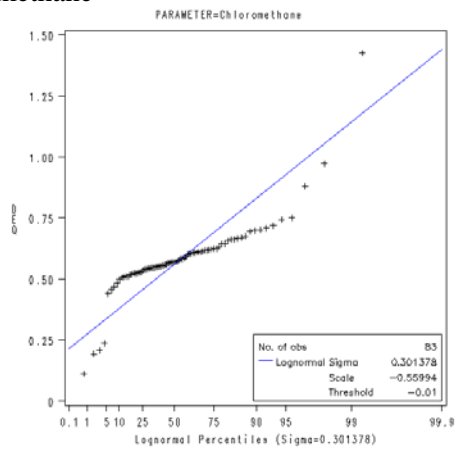

## Dichlorodifluoromethane

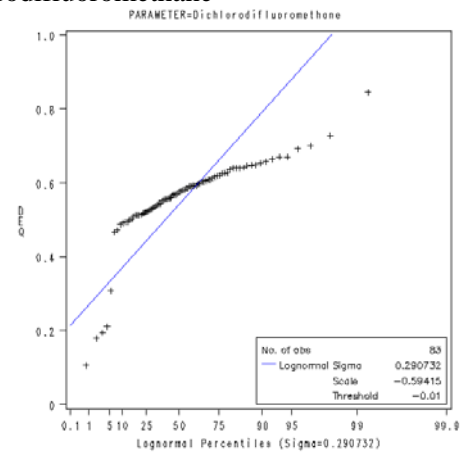

## Ethylbenzene

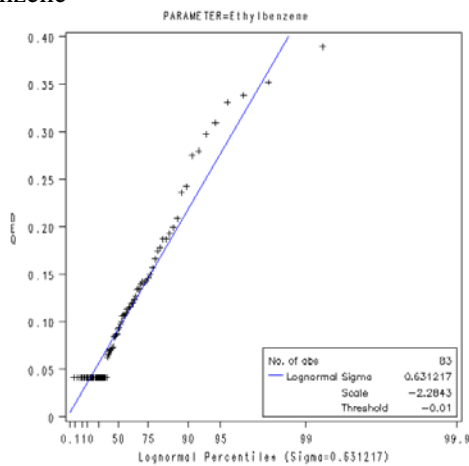

## Hexane

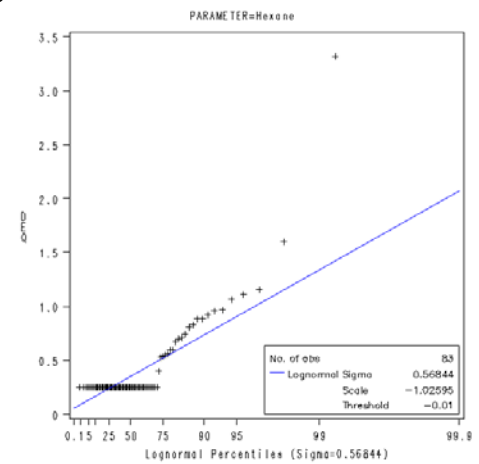



# VOCs (Cont.)

## m,p-Xylene

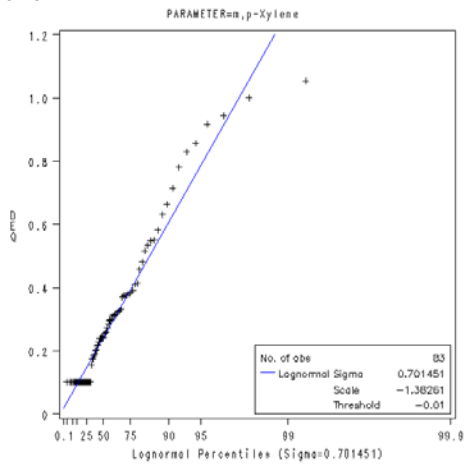

## Methylene chloride

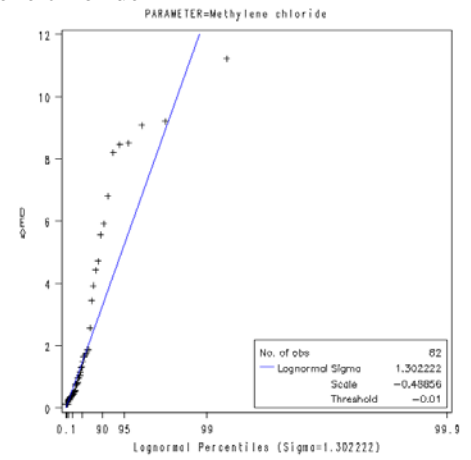

## o-Xylene

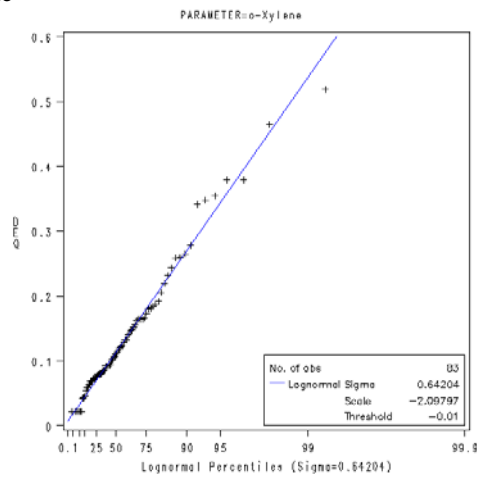

## Tetrachloroethylene

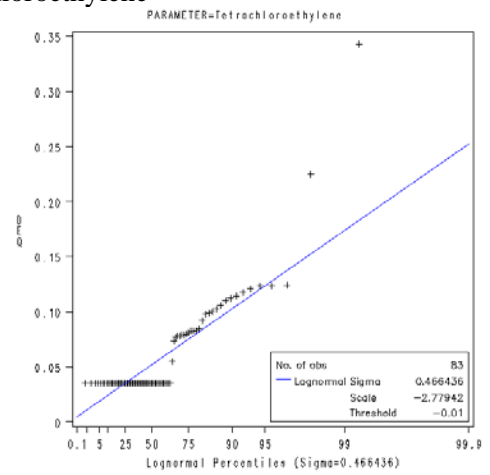

## Toluene

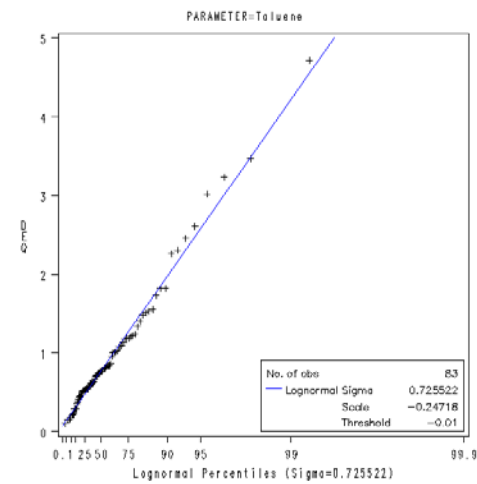

## Trichlorofluoromethane

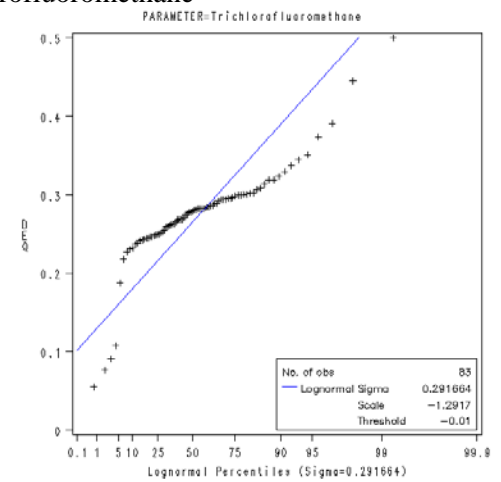

## Supplement 6. Spearman rank correlation coefficients between air toxics and criteria pollutants and meteorological variables.

Variable dictionary is shown in Supplement 8.

| VARIABLES                  | ACETALD | BNZALD | FORMALD | HEXALD | IBUTYRAL | PROPIONALD | TOLUALD | ACETYL | BNZ   | BUTADNE | DCDFM | EBNZ  | MEK   | MPX   | NOCTANE | OXY   | PROPYL | TCEL  | TCFM  | TCIFE | TMBNZ_124 | TMBNZ_135 | TOLUENE |
|----------------------------|---------|--------|---------|--------|----------|------------|---------|--------|-------|---------|-------|-------|-------|-------|---------|-------|--------|-------|-------|-------|-----------|-----------|---------|
| <i>Criteria pollutants</i> |         |        |         |        |          |            |         |        |       |         |       |       |       |       |         |       |        |       |       |       |           |           |         |
| APCO_24HR                  | 0.30    | 0.25   | 0.30    | 0.11   | 0.21     | 0.26       | 0.12    | 0.60   | 0.57  | 0.43    | 0.15  | 0.49  | 0.18  | 0.48  | 0.21    | 0.50  | 0.48   | 0.20  | 0.12  | -0.01 | 0.49      | 0.46      | 0.53    |
| AP_PM25                    | 0.41    | 0.43   | 0.39    | 0.40   | 0.31     | 0.38       | 0.34    | 0.25   | 0.45  | 0.12    | 0.17  | 0.39  | 0.56  | 0.39  | 0.22    | 0.41  | 0.38   | 0.16  | 0.28  | -0.05 | 0.41      | 0.36      | 0.47    |
| DB_pm10                    | 0.19    | 0.22   | 0.15    | 0.06   | 0.09     | 0.18       | 0.15    | 0.09   | 0.10  | -0.03   | 0.02  | 0.07  | 0.26  | 0.06  | 0.09    | 0.05  | 0.20   | -0.09 | -0.02 | -0.06 | 0.03      | 0.08      | 0.05    |
| E7MNO2_24HR                | 0.19    | 0.14   | 0.19    | -0.03  | 0.15     | 0.17       | -0.01   | 0.54   | 0.38  | 0.29    | 0.08  | 0.30  | 0.10  | 0.28  | 0.16    | 0.28  | 0.52   | 0.05  | -0.02 | 0.10  | 0.27      | 0.20      | 0.28    |
| E7MSO2_24HR                | 0.21    | 0.18   | 0.14    | 0.17   | 0.13     | 0.22       | 0.11    | 0.23   | 0.31  | 0.06    | 0.05  | 0.06  | 0.28  | 0.05  | 0.09    | 0.11  | 0.38   | 0.07  | -0.02 | -0.02 | 0.10      | 0.08      | 0.21    |
| LWCO_24HR                  | 0.30    | 0.30   | 0.31    | 0.09   | 0.21     | 0.27       | 0.16    | 0.54   | 0.49  | 0.38    | 0.09  | 0.47  | 0.22  | 0.46  | 0.21    | 0.47  | 0.58   | 0.13  | 0.11  | 0.04  | 0.42      | 0.39      | 0.47    |
| LWNO2_24HR                 | 0.27    | 0.30   | 0.30    | 0.15   | 0.23     | 0.24       | 0.18    | 0.47   | 0.48  | 0.19    | 0.03  | 0.35  | 0.20  | 0.33  | 0.16    | 0.35  | 0.48   | 0.09  | -0.07 | 0.03  | 0.31      | 0.24      | 0.36    |
| LWSO2_24HR                 | 0.17    | 0.17   | 0.14    | 0.12   | 0.08     | 0.16       | 0.11    | 0.33   | 0.38  | 0.09    | -0.05 | 0.15  | 0.21  | 0.15  | 0.15    | 0.20  | 0.47   | 0.09  | -0.01 | -0.02 | 0.18      | 0.13      | 0.26    |
| LW_PM25                    | 0.23    | 0.21   | 0.18    | 0.14   | 0.09     | 0.21       | 0.15    | 0.27   | 0.37  | -0.03   | 0.00  | 0.19  | 0.33  | 0.17  | 0.11    | 0.19  | 0.35   | 0.06  | 0.03  | -0.05 | 0.18      | 0.13      | 0.27    |
| <i>Meteorology</i>         |         |        |         |        |          |            |         |        |       |         |       |       |       |       |         |       |        |       |       |       |           |           |         |
| DPTP_DTW                   | 0.54    | 0.61   | 0.51    | 0.70   | 0.45     | 0.53       | 0.54    | -0.10  | 0.24  | 0.05    | 0.36  | 0.36  | 0.71  | 0.39  | 0.18    | 0.40  | 0.21   | 0.16  | 0.43  | -0.11 | 0.39      | 0.31      | 0.45    |
| MIX_HT                     | 0.12    | 0.25   | 0.16    | 0.31   | 0.09     | 0.17       | 0.24    | -0.30  | -0.20 | -0.18   | 0.14  | -0.09 | 0.16  | -0.08 | -0.02   | -0.09 | -0.19  | -0.06 | 0.00  | -0.11 | -0.09     | -0.09     | -0.10   |
| MNRH_DTW                   | -0.12   | -0.17  | -0.12   | -0.18  | -0.14    | -0.15      | -0.14   | 0.05   | 0.03  | 0.00    | -0.12 | -0.01 | -0.11 | -0.01 | -0.05   | -0.01 | 0.14   | 0.05  | 0.03  | 0.13  | -0.04     | -0.01     | -0.06   |
| MNTP_DTW                   | 0.54    | 0.62   | 0.51    | 0.71   | 0.46     | 0.54       | 0.54    | -0.12  | 0.20  | 0.02    | 0.37  | 0.34  | 0.72  | 0.37  | 0.18    | 0.38  | 0.16   | 0.13  | 0.41  | -0.16 | 0.38      | 0.29      | 0.44    |
| MXRH_DTW                   | 0.19    | 0.13   | 0.17    | 0.17   | 0.15     | 0.13       | 0.12    | 0.10   | 0.19  | 0.16    | 0.04  | 0.23  | 0.17  | 0.23  | 0.06    | 0.22  | 0.25   | 0.13  | 0.18  | 0.09  | 0.21      | 0.16      | 0.21    |
| PRCP_DTW                   | -0.08   | -0.10  | -0.07   | -0.01  | -0.07    | -0.10      | -0.11   | -0.14  | -0.07 | -0.14   | -0.12 | -0.08 | -0.04 | -0.08 | -0.14   | -0.09 | 0.04   | -0.04 | -0.09 | 0.05  | -0.08     | -0.13     | -0.11   |
| PRES_DTW                   | 0.03    | 0.04   | 0.05    | 0.00   | 0.10     | 0.02       | -0.03   | 0.23   | 0.21  | 0.24    | 0.05  | 0.18  | 0.01  | 0.17  | 0.10    | 0.21  | 0.05   | 0.04  | 0.06  | -0.01 | 0.21      | 0.15      | 0.24    |
| RWND_DTW                   | -0.37   | -0.44  | -0.36   | -0.43  | -0.32    | -0.34      | -0.29   | -0.38  | -0.59 | -0.41   | -0.26 | -0.52 | -0.44 | -0.53 | -0.24   | -0.57 | -0.25  | -0.36 | -0.28 | 0.17  | -0.60     | -0.54     | -0.65   |
| SLVP_DTW                   | 0.00    | 0.00   | 0.01    | -0.05  | 0.07     | -0.01      | -0.07   | 0.24   | 0.19  | 0.24    | 0.03  | 0.15  | -0.04 | 0.14  | 0.09    | 0.18  | 0.04   | 0.02  | 0.04  | 0.01  | 0.18      | 0.13      | 0.20    |
| WDIR_S1                    | 0.14    | 0.16   | 0.16    | 0.23   | 0.16     | 0.15       | 0.11    | 0.18   | 0.22  | 0.25    | 0.24  | 0.26  | 0.15  | 0.28  | 0.14    | 0.32  | -0.03  | 0.09  | 0.27  | -0.06 | 0.36      | 0.31      | 0.37    |
| WDIR_S2                    | 0.12    | 0.09   | 0.15    | 0.17   | 0.15     | 0.08       | 0.08    | 0.13   | 0.28  | 0.11    | 0.08  | 0.15  | 0.13  | 0.15  | 0.09    | 0.19  | 0.02   | 0.14  | 0.08  | -0.09 | 0.21      | 0.13      | 0.27    |
| WDIR_S3                    | 0.13    | 0.13   | 0.11    | 0.20   | 0.12     | 0.09       | 0.08    | 0.09   | 0.42  | 0.12    | 0.10  | 0.14  | 0.27  | 0.13  | 0.09    | 0.17  | 0.07   | 0.21  | 0.09  | -0.09 | 0.20      | 0.14      | 0.27    |
| WDIR_S4                    | 0.23    | 0.21   | 0.17    | 0.20   | 0.18     | 0.19       | 0.09    | 0.13   | 0.36  | 0.07    | 0.09  | 0.11  | 0.32  | 0.10  | 0.17    | 0.15  | 0.42   | 0.06  | 0.11  | 0.03  | 0.11      | 0.08      | 0.21    |
| WDIR_S5                    | 0.07    | -0.02  | -0.02   | -0.12  | -0.01    | 0.05       | -0.08   | 0.03   | -0.08 | -0.10   | -0.16 | -0.12 | -0.03 | -0.13 | 0.03    | -0.14 | 0.30   | -0.30 | -0.11 | 0.11  | -0.18     | -0.15     | -0.15   |
| WDIR_S6                    | -0.16   | -0.12  | -0.12   | -0.21  | -0.16    | -0.14      | -0.10   | -0.19  | -0.35 | -0.20   | -0.16 | -0.13 | -0.21 | -0.13 | -0.18   | -0.22 | -0.26  | -0.19 | -0.16 | -0.04 | -0.23     | -0.14     | -0.33   |
| WDIR_S7                    | -0.15   | -0.06  | -0.07   | -0.07  | -0.09    | -0.11      | 0.03    | -0.14  | -0.24 | -0.01   | 0.03  | 0.09  | -0.14 | 0.10  | -0.13   | 0.03  | -0.23  | 0.14  | -0.04 | -0.15 | 0.05      | 0.07      | -0.08   |
| WDIR_S8                    | -0.01   | 0.03   | 0.00    | 0.11   | 0.10     | 0.01       | 0.08    | -0.02  | -0.05 | 0.16    | 0.10  | 0.07  | -0.03 | 0.08  | 0.01    | 0.11  | -0.19  | 0.16  | 0.06  | -0.08 | 0.15      | 0.13      | 0.14    |

## Supplement 7. Spearman rank correlation coefficients between selected carbonyls and VOCs.

Variable dictionary is shown in Supplement 8.

| VARIABLES        | ACETALD | BNZALD | FORMALD | HEXALD | IBUTYRAL | PROPIONALD | TOLUALD | ACETYL | BNZ  | BUTADNE | DCDFM | EBNZ | MEK   | MPX  | NOCTANE | OXY   | PROPYL | TCEL  | TCFM | TCTFE | TMBNZ_124 | TMBNZ_135 | TOLUENE |  |
|------------------|---------|--------|---------|--------|----------|------------|---------|--------|------|---------|-------|------|-------|------|---------|-------|--------|-------|------|-------|-----------|-----------|---------|--|
| <i>Carbonyls</i> |         |        |         |        |          |            |         |        |      |         |       |      |       |      |         |       |        |       |      |       |           |           |         |  |
| ACETALD          | 1.00    |        |         |        |          |            |         |        |      |         |       |      |       |      |         |       |        |       |      |       |           |           |         |  |
| BNZALD           | 0.80    | 1.00   |         |        |          |            |         |        |      |         |       |      |       |      |         |       |        |       |      |       |           |           |         |  |
| FORMALD          | 0.90    | 0.79   | 1.00    |        |          |            |         |        |      |         |       |      |       |      |         |       |        |       |      |       |           |           |         |  |
| HEXALD           | 0.77    | 0.87   | 0.75    | 1.00   |          |            |         |        |      |         |       |      |       |      |         |       |        |       |      |       |           |           |         |  |
| IBUTYRAL         | 0.85    | 0.69   | 0.80    | 0.72   | 1.00     |            |         |        |      |         |       |      |       |      |         |       |        |       |      |       |           |           |         |  |
| PROPIONALD       | 0.95    | 0.80   | 0.87    | 0.79   | 0.80     | 1.00       |         |        |      |         |       |      |       |      |         |       |        |       |      |       |           |           |         |  |
| TOLUALD          | 0.66    | 0.71   | 0.63    | 0.76   | 0.57     | 0.69       | 1.00    |        |      |         |       |      |       |      |         |       |        |       |      |       |           |           |         |  |
| <i>VOCs</i>      |         |        |         |        |          |            |         |        |      |         |       |      |       |      |         |       |        |       |      |       |           |           |         |  |
| ACETYL           | 0.30    | 0.24   | 0.30    | 0.11   | 0.20     | 0.28       | 0.14    | 1.00   |      |         |       |      |       |      |         |       |        |       |      |       |           |           |         |  |
| BNZ              | 0.41    | 0.41   | 0.38    | 0.31   | 0.29     | 0.37       | 0.27    | 0.69   | 1.00 |         |       |      |       |      |         |       |        |       |      |       |           |           |         |  |
| BUTADNE          | 0.40    | 0.36   | 0.41    | 0.24   | 0.35     | 0.36       | 0.21    | 0.54   | 0.52 | 1.00    |       |      |       |      |         |       |        |       |      |       |           |           |         |  |
| DCDFM            | 0.38    | 0.33   | 0.36    | 0.40   | 0.39     | 0.39       | 0.31    | 0.22   | 0.24 | 0.26    | 1.00  |      |       |      |         |       |        |       |      |       |           |           |         |  |
| EBNZ             | 0.44    | 0.44   | 0.45    | 0.34   | 0.37     | 0.38       | 0.32    | 0.51   | 0.67 | 0.55    | 0.37  | 1.00 |       |      |         |       |        |       |      |       |           |           |         |  |
| MEK              | 0.51    | 0.59   | 0.48    | 0.58   | 0.47     | 0.50       | 0.42    | 0.16   | 0.45 | 0.25    | 0.40  | 0.47 | 1.00  |      |         |       |        |       |      |       |           |           |         |  |
| MPX              | 0.45    | 0.46   | 0.47    | 0.38   | 0.39     | 0.40       | 0.36    | 0.49   | 0.66 | 0.55    | 0.39  | 0.99 | 0.48  | 1.00 |         |       |        |       |      |       |           |           |         |  |
| NOCTANE          | 0.36    | 0.30   | 0.31    | 0.26   | 0.27     | 0.34       | 0.26    | 0.32   | 0.44 | 0.52    | 0.24  | 0.44 | 0.32  | 0.43 | 1.00    |       |        |       |      |       |           |           |         |  |
| OXY              | 0.49    | 0.50   | 0.49    | 0.42   | 0.40     | 0.44       | 0.38    | 0.53   | 0.72 | 0.57    | 0.40  | 0.97 | 0.51  | 0.97 | 0.47    | 1.00  |        |       |      |       |           |           |         |  |
| PROPYL           | 0.47    | 0.34   | 0.42    | 0.24   | 0.35     | 0.42       | 0.25    | 0.58   | 0.57 | 0.47    | 0.24  | 0.47 | 0.27  | 0.47 | 0.39    | 0.50  | 1.00   |       |      |       |           |           |         |  |
| TCEL             | 0.10    | 0.19   | 0.15    | 0.15   | 0.05     | 0.08       | 0.12    | 0.33   | 0.43 | 0.35    | 0.11  | 0.40 | 0.27  | 0.40 | 0.30    | 0.43  | 0.17   | 1.00  |      |       |           |           |         |  |
| TCFM             | 0.42    | 0.34   | 0.39    | 0.42   | 0.37     | 0.41       | 0.35    | 0.16   | 0.24 | 0.28    | 0.69  | 0.39 | 0.35  | 0.42 | 0.28    | 0.43  | 0.31   | 0.06  | 1.00 |       |           |           |         |  |
| TCTFE            | 0.12    | -0.12  | 0.08    | -0.04  | 0.15     | 0.07       | -0.04   | 0.05   | 0.01 | 0.17    | 0.09  | 0.02 | -0.01 | 0.00 | 0.16    | -0.02 | 0.17   | -0.11 | 0.06 | 1.00  |           |           |         |  |
| TMBNZ_124        | 0.46    | 0.47   | 0.47    | 0.40   | 0.38     | 0.40       | 0.35    | 0.53   | 0.70 | 0.59    | 0.40  | 0.94 | 0.52  | 0.94 | 0.45    | 0.94  | 0.44   | 0.44  | 0.41 | -0.03 | 1.00      |           |         |  |
| TMBNZ_135        | 0.40    | 0.45   | 0.40    | 0.35   | 0.31     | 0.36       | 0.36    | 0.52   | 0.63 | 0.60    | 0.35  | 0.81 | 0.43  | 0.81 | 0.45    | 0.82  | 0.40   | 0.45  | 0.38 | -0.04 | 0.86      | 1.00      |         |  |
| TOLUENE          | 0.52    | 0.55   | 0.52    | 0.48   | 0.43     | 0.47       | 0.36    | 0.57   | 0.80 | 0.55    | 0.37  | 0.84 | 0.56  | 0.84 | 0.43    | 0.88  | 0.51   | 0.45  | 0.42 | -0.06 | 0.86      | 0.75      | 1.00    |  |

Supplement 8. Variable dictionary

| Variables                         | Descriptions                                   |
|-----------------------------------|------------------------------------------------|
| <b><i>Carbonyls</i></b>           |                                                |
| ACETALD                           | Acetaldehyde                                   |
| BNZALD                            | Benzaldehyde                                   |
| FORMALD                           | Formaldehyde                                   |
| HEXALD                            | Hexaldehyde                                    |
| IBUTYRAL                          | iso-Butyraldehyde                              |
| PROPIONALD                        | Propionaldehyde                                |
| TOLUALD                           | Tolualdehyde                                   |
| <b><i>VOCs</i></b>                |                                                |
| ACETYL                            | Acetylene                                      |
| BNZ                               | Benzene                                        |
| BUTADNE                           | 1,3-Butadiene                                  |
| CHLOMET                           | Chloromethane                                  |
| DCDFM                             | Dichlorodifluoromethane                        |
| EBNZ                              | Ethylbenzene                                   |
| MEK                               | Methyl ethyl ketone                            |
| MPX                               | m,p-Xylene                                     |
| NOCTANE                           | n-Octane                                       |
| OXY                               | o-Xylene                                       |
| PROPYL                            | Propylene                                      |
| TCEL                              | Tetrachloroethylene                            |
| TCFM                              | Trichlorofluoromethane                         |
| TCTFE                             | Trichlorotrifluoroethane                       |
| TMBNZ_124                         | 1,2,4-Trimethylbenzene                         |
| TMBNZ_135                         | 1,3,5-Trimethylbenzene                         |
| TOLUENE                           | Toluene                                        |
| <b><i>Criteria pollutants</i></b> |                                                |
| APCO_24HR                         | Allen Park-24H CO                              |
| AP_PM25                           | Allen Park-PM2.5                               |
| DB_pm10                           | PM10 at Dearborn                               |
| E7MNO2_24HR                       | East Seven Mile-24H NO2                        |
| E7MSO2_24HR                       | East Seven Mile-24H SO2                        |
| LWCO_24HR                         | Linwood-24H CO                                 |
| LWNO2_24HR                        | Linwood-24H NO2                                |
| LWSO2_24HR                        | Linwood-24H SO2                                |
| LW_PM25                           | Linwood-PM2.5                                  |
| <b><i>Meteorology</i></b>         |                                                |
| AWND_DTW                          | Detroit metro airport avg wind speed           |
| DPTP_DTW                          | Detroit metro airport dewpoint                 |
| MIX_HT                            | Mixing height                                  |
| MNRH_DTW                          | Detroit metro airport min relative humidity    |
| MNTP_DTW                          | Detroit metro airport temperature              |
| MXRH_DTW                          | Detroit metro airport max relative humidity    |
| PRCP_DTW                          | Detroit metro airport precipitation            |
| PRES_DTW                          | Detroit metro airport pressure                 |
| RDIR_DTW                          | Detroit metro airport resultant wind direction |
| RWND_DTW                          | Detroit metro airport resultant wind speed     |
| SLVP_DTW                          | Detroit metro airport sea level pressure       |

Supplement 9. Performance indicators for MI and OLE estimates for carbonyls.

Bold values show highest performing model in group. Abbreviations: lag0=current day observation; lag1=current and previous day observations; lead1=current and next day observations; LL1=current, previous and next day observations; SD=standard deviation; d<sub>2</sub>=Willmot's index of agreement; R<sup>2</sup>=coefficient of determination; MAE=mean absolute error.

| Performance indicators | Multiple imputation |                    |                    |                    | Optimal estimation |             |             |      |             |
|------------------------|---------------------|--------------------|--------------------|--------------------|--------------------|-------------|-------------|------|-------------|
|                        | lag0(SD)            | lag1(SD)           | lead1(SD)          | LL1(SD)            | lag0               | lag1        | lead1       | LL1  |             |
| <b>Acetaldehyde</b>    |                     |                    |                    |                    |                    |             |             |      |             |
| <i>Random</i>          | d <sub>2</sub>      | <b>0.95 (0.01)</b> | 0.95 (0.01)        | 0.95 (0.01)        | 0.95 (0.00)        | 0.86        | <b>0.89</b> | 0.74 | 0.88        |
|                        | R <sup>2</sup>      | <b>0.83 (0.02)</b> | 0.80 (0.02)        | 0.83 (0.02)        | 0.83 (0.01)        | 0.69        | <b>0.72</b> | 0.51 | 0.70        |
|                        | MAE                 | <b>0.29 (0.03)</b> | 0.30 (0.03)        | 0.30 (0.02)        | 0.30 (0.01)        | 0.30        | <b>0.26</b> | 0.46 | 0.28        |
| <i>Block 5</i>         | d <sub>2</sub>      | <b>0.95 (0.01)</b> | 0.95 (0.01)        | 0.95 (0.01)        | 0.94 (0.00)        | 0.79        | 0.81        | 0.71 | <b>0.86</b> |
|                        | R <sup>2</sup>      | <b>0.84 (0.03)</b> | 0.83 (0.02)        | 0.84 (0.03)        | 0.82 (0.01)        | 0.73        | 0.73        | 0.69 | <b>0.79</b> |
|                        | MAE                 | <b>0.30 (0.03)</b> | 0.31 (0.01)        | 0.30 (0.04)        | 0.31 (0.01)        | 0.43        | 0.42        | 0.57 | <b>0.32</b> |
| <i>Row-wise</i>        | d <sub>2</sub>      | 0.58 (0.05)        | <b>0.67 (0.04)</b> | 0.51 (0.05)        | 0.63 (0.06)        | <b>0.67</b> | 0.63        | 0.47 | 0.46        |
|                        | R <sup>2</sup>      | 0.11 (0.05)        | <b>0.20 (0.06)</b> | 0.04 (0.02)        | 0.14 (0.08)        | <b>0.32</b> | 0.26        | 0.09 | 0.11        |
|                        | MAE                 | 0.87 (0.08)        | <b>0.85 (0.12)</b> | 0.91 (0.04)        | 0.87 (0.06)        | <b>0.62</b> | 0.66        | 0.83 | 0.79        |
| <b>Benzaldehyde</b>    |                     |                    |                    |                    |                    |             |             |      |             |
| <i>Random</i>          | d <sub>2</sub>      | 0.80 (0.03)        | <b>0.83 (0.02)</b> | 0.76 (0.05)        | 0.76 (0.01)        | <b>0.88</b> | 0.82        | 0.77 | 0.83        |
|                        | R <sup>2</sup>      | 0.46 (0.07)        | <b>0.55 (0.03)</b> | 0.38 (0.10)        | 0.38 (0.03)        | <b>0.62</b> | 0.48        | 0.44 | 0.51        |
|                        | MAE                 | 0.02 (0.00)        | <b>0.02 (0.00)</b> | 0.03 (0.00)        | 0.03 (0.00)        | <b>0.00</b> | 0.00        | 0.00 | 0.00        |
| <i>Block 5</i>         | d <sub>2</sub>      | <b>0.77 (0.03)</b> | 0.72 (0.01)        | 0.63 (0.07)        | 0.73 (0.03)        | <b>0.55</b> | 0.50        | 0.36 | 0.51        |
|                        | R <sup>2</sup>      | <b>0.49 (0.06)</b> | 0.43 (0.06)        | 0.29 (0.11)        | 0.46 (0.07)        | <b>0.41</b> | 0.30        | 0.09 | 0.32        |
|                        | MAE                 | <b>0.02 (0.00)</b> | 0.03 (0.00)        | 0.03 (0.00)        | 0.03 (0.00)        | <b>0.00</b> | 0.00        | 0.00 | 0.00        |
| <i>Row-wise</i>        | d <sub>2</sub>      | 0.48 (0.06)        | <b>0.54 (0.03)</b> | 0.35 (0.05)        | 0.38 (0.05)        | 0.50        | <b>0.57</b> | 0.25 | 0.31        |
|                        | R <sup>2</sup>      | 0.05 (0.05)        | <b>0.09 (0.02)</b> | 0.01 (0.01)        | 0.00 (0.01)        | 0.07        | <b>0.13</b> | 0.02 | 0.00        |
|                        | MAE                 | 0.04 (0.00)        | <b>0.04 (0.00)</b> | 0.05 (0.00)        | 0.05 (0.00)        | 0.00        | <b>0.00</b> | 0.00 | 0.00        |
| <b>Formaldehyde</b>    |                     |                    |                    |                    |                    |             |             |      |             |
| <i>Random</i>          | d <sub>2</sub>      | 0.84 (0.02)        | 0.80 (0.04)        | <b>0.85 (0.01)</b> | 0.81 (0.04)        | <b>0.86</b> | 0.82        | 0.84 | 0.83        |
|                        | R <sup>2</sup>      | 0.53 (0.05)        | 0.44 (0.07)        | <b>0.54 (0.03)</b> | 0.45 (0.09)        | <b>0.63</b> | 0.62        | 0.69 | 0.63        |
|                        | MAE                 | 0.80 (0.03)        | 0.90 (0.10)        | <b>0.81 (0.03)</b> | 0.86 (0.05)        | <b>0.72</b> | 0.78        | 0.69 | 0.77        |
| <i>Block 5</i>         | d <sub>2</sub>      | <b>0.88 (0.03)</b> | 0.85 (0.03)        | 0.86 (0.01)        | 0.87 (0.04)        | 0.78        | 0.79        | 0.79 | <b>0.80</b> |
|                        | R <sup>2</sup>      | <b>0.63 (0.09)</b> | 0.56 (0.08)        | 0.58 (0.04)        | 0.60 (0.10)        | 0.55        | 0.65        | 0.66 | <b>0.66</b> |
|                        | MAE                 | <b>0.84 (0.11)</b> | 0.84 (0.11)        | 0.87 (0.04)        | 0.83 (0.12)        | 1.12        | 0.99        | 1.00 | <b>0.97</b> |
| <i>Row-wise</i>        | d <sub>2</sub>      | 0.51 (0.06)        | <b>0.53 (0.03)</b> | 0.40 (0.06)        | 0.40 (0.06)        | 0.52        | <b>0.54</b> | 0.33 | 0.33        |
|                        | R <sup>2</sup>      | 0.05 (0.04)        | <b>0.06 (0.03)</b> | 0.01 (0.01)        | 0.01 (0.01)        | 0.09        | <b>0.11</b> | 0.00 | 0.00        |
|                        | MAE                 | 1.49 (0.14)        | <b>1.58 (0.12)</b> | 1.79 (0.14)        | 1.79 (0.14)        | 2.37        | <b>2.31</b> | 2.65 | 2.65        |

| Performance indicators   |                | Multiple imputation |                    |             |                    | Optimal estimation |             |       |             |      |
|--------------------------|----------------|---------------------|--------------------|-------------|--------------------|--------------------|-------------|-------|-------------|------|
|                          |                | lag0(SD)            | lag1(SD)           | lead1(SD)   | LL1(SD)            | lag0               | lag1        | lead1 | LL1         |      |
| <b>Hexaldehyde</b>       |                |                     |                    |             |                    |                    |             |       |             |      |
| <i>Random</i>            | d <sub>2</sub> | 0.70 (0.04)         | 0.82 (0.03)        | 0.83 (0.02) | <b>0.85 (0.04)</b> | 0.69               | 0.69        | 0.52  | <b>0.81</b> |      |
|                          | R <sup>2</sup> | 0.26 (0.05)         | 0.46 (0.07)        | 0.50 (0.04) | <b>0.55 (0.09)</b> | 0.29               | 0.41        | 0.13  | <b>0.54</b> |      |
|                          | MAE            | 0.12 (0.01)         | 0.09 (0.00)        | 0.10 (0.01) | <b>0.07 (0.00)</b> | 0.02               | 0.01        | 0.02  | <b>0.01</b> |      |
| <i>Block 5</i>           | d <sub>2</sub> | 0.71 (0.04)         | 0.68 (0.03)        | 0.70 (0.03) | <b>0.76 (0.03)</b> | 0.62               | 0.54        | 0.56  | <b>0.66</b> |      |
|                          | R <sup>2</sup> | 0.32 (0.07)         | 0.23 (0.07)        | 0.29 (0.05) | <b>0.37 (0.05)</b> | 0.39               | 0.22        | 0.24  | <b>0.44</b> |      |
|                          | MAE            | 0.12 (0.01)         | 0.13 (0.01)        | 0.12 (0.01) | <b>0.12 (0.01)</b> | 0.02               | 0.03        | 0.03  | <b>0.02</b> |      |
| <i>Row-wise</i>          | d <sub>2</sub> | 0.64 (0.03)         | <b>0.76 (0.05)</b> | 0.64 (0.04) | 0.75 (0.03)        | 0.71               | 0.74        | 0.73  | <b>0.73</b> |      |
|                          | R <sup>2</sup> | 0.18 (0.04)         | <b>0.34 (0.09)</b> | 0.17 (0.05) | 0.33 (0.06)        | 0.39               | 0.45        | 0.43  | <b>0.42</b> |      |
|                          | MAE            | 0.14 (0.01)         | <b>0.12 (0.01)</b> | 0.14 (0.00) | 0.12 (0.01)        | 0.02               | 0.02        | 0.02  | <b>0.02</b> |      |
| <b>iso-Butyraldehyde</b> |                |                     |                    |             |                    |                    |             |       |             |      |
| <i>Random</i>            | d <sub>2</sub> | <b>0.90 (0.01)</b>  | 0.90 (0.01)        | 0.90 (0.01) | 0.89 (0.03)        | <b>0.79</b>        | 0.79        | 0.79  | 0.79        |      |
|                          | R <sup>2</sup> | <b>0.68 (0.03)</b>  | 0.68 (0.03)        | 0.68 (0.03) | 0.65 (0.09)        | <b>0.74</b>        | 0.74        | 0.74  | 0.67        |      |
|                          | MAE            | <b>0.08 (0.00)</b>  | 0.08 (0.00)        | 0.08 (0.00) | 0.09 (0.01)        | <b>0.02</b>        | 0.02        | 0.02  | 0.02        |      |
| <i>Block 5</i>           | d <sub>2</sub> | 0.83 (0.02)         | 0.83 (0.02)        | 0.83 (0.02) | <b>0.85 (0.02)</b> | 0.74               | 0.74        | 0.74  | <b>0.81</b> |      |
|                          | R <sup>2</sup> | 0.52 (0.03)         | 0.52 (0.03)        | 0.52 (0.03) | <b>0.58 (0.05)</b> | 0.47               | 0.47        | 0.47  | <b>0.53</b> |      |
|                          | MAE            | 0.10 (0.01)         | 0.10 (0.01)        | 0.10 (0.01) | <b>0.09 (0.01)</b> | 0.02               | 0.02        | 0.02  | <b>0.01</b> |      |
| <i>Row-wise</i>          | d <sub>2</sub> | 0.56 (0.10)         | 0.56 (0.03)        | 0.37 (0.05) | <b>0.58 (0.08)</b> | <b>0.64</b>        | 0.44        | 0.27  | 0.40        |      |
|                          | R <sup>2</sup> | 0.12 (0.08)         | 0.09 (0.04)        | 0.01 (0.01) | <b>0.11 (0.05)</b> | <b>0.24</b>        | 0.06        | 0.01  | 0.05        |      |
|                          | MAE            | 0.15 (0.02)         | 0.17 (0.01)        | 0.18 (0.00) | <b>0.15 (0.01)</b> | <b>0.02</b>        | 0.02        | 0.02  | 0.02        |      |
| <b>Propionaldehyde</b>   |                |                     |                    |             |                    |                    |             |       |             |      |
| <i>Random</i>            | d <sub>2</sub> | <b>0.93 (0.01)</b>  | 0.93 (0.01)        | 0.93 (0.00) | 0.93 (0.01)        | 0.84               | 0.86        | 0.86  | <b>0.87</b> |      |
|                          | R <sup>2</sup> | <b>0.77 (0.04)</b>  | 0.78 (0.02)        | 0.75 (0.02) | 0.77 (0.04)        | 0.72               | 0.75        | 0.75  | <b>0.76</b> |      |
|                          | MAE            | <b>0.05 (0.00)</b>  | 0.05 (0.00)        | 0.05 (0.00) | 0.05 (0.01)        | 0.01               | 0.01        | 0.01  | <b>0.01</b> |      |
| <i>Block 5</i>           | d <sub>2</sub> | <b>0.93 (0.01)</b>  | 0.93 (0.01)        | 0.92 (0.01) | 0.93 (0.01)        | 0.75               | 0.79        | 0.77  | <b>0.83</b> |      |
|                          | R <sup>2</sup> | <b>0.78 (0.03)</b>  | 0.76 (0.02)        | 0.74 (0.04) | 0.76 (0.02)        | 0.65               | 0.71        | 0.67  | <b>0.76</b> |      |
|                          | MAE            | <b>0.05 (0.00)</b>  | 0.05 (0.00)        | 0.05 (0.00) | 0.05 (0.00)        | 0.01               | 0.01        | 0.01  | <b>0.01</b> |      |
| <i>Row-wise</i>          | d <sub>2</sub> | -                   | -                  | 0.62 (0.04) | 0.56 (0.16)        | <b>0.68 (0.02)</b> | <b>0.59</b> | 0.41  | 0.27        | 0.32 |
|                          | R <sup>2</sup> | -                   | -                  | 0.16 (0.06) | 0.13 (0.14)        | <b>0.22 (0.04)</b> | <b>0.22</b> | 0.06  | 0.00        | 0.01 |
|                          | MAE            | -                   | -                  | 0.11 (0.01) | 0.05 (0.01)        | <b>0.11 (0.01)</b> | <b>0.01</b> | 0.02  | 0.02        | 0.02 |
| <b>Tolualdehyde</b>      |                |                     |                    |             |                    |                    |             |       |             |      |
| <i>Random</i>            | d <sub>2</sub> | <b>0.72 (0.04)</b>  | 0.60 (0.07)        | 0.54 (0.09) | 0.54 (0.09)        | <b>0.58</b>        | 0.54        | 0.36  | 0.36        |      |
|                          | R <sup>2</sup> | <b>0.30 (0.07)</b>  | 0.15 (0.08)        | 0.10 (0.05) | 0.10 (0.05)        | <b>0.25</b>        | 0.23        | 0.05  | 0.05        |      |
|                          | MAE            | <b>0.03 (0.00)</b>  | 0.03 (0.00)        | 0.03 (0.00) | 0.03 (0.00)        | <b>0.00</b>        | 0.00        | 0.00  | 0.00        |      |
| <i>Block 5</i>           | d <sub>2</sub> | <b>0.66 (0.05)</b>  | 0.59 (0.06)        | 0.50 (0.03) | 0.50 (0.03)        | <b>0.55</b>        | 0.50        | 0.39  | 0.39        |      |
|                          | R <sup>2</sup> | <b>0.22 (0.06)</b>  | 0.13 (0.06)        | 0.06 (0.03) | 0.06 (0.03)        | <b>0.20</b>        | 0.15        | 0.05  | 0.05        |      |
|                          | MAE            | <b>0.03 (0.00)</b>  | 0.03 (0.00)        | 0.03 (0.00) | 0.03 (0.00)        | <b>0.00</b>        | 0.00        | 0.00  | 0.00        |      |
| <i>Row-wise</i>          | d <sub>2</sub> | <b>0.56 (0.08)</b>  | 0.51 (0.11)        | 0.46 (0.13) | 0.53 (0.09)        | <b>0.64</b>        | 0.52        | 0.45  | 0.52        |      |
|                          | R <sup>2</sup> | <b>0.10 (0.07)</b>  | 0.06 (0.05)        | 0.05 (0.09) | 0.08 (0.07)        | <b>0.26</b>        | 0.12        | 0.07  | 0.12        |      |
|                          | MAE            | <b>0.04 (0.00)</b>  | 0.04 (0.00)        | 0.04 (0.01) | 0.03 (0.00)        | <b>0.00</b>        | 0.00        | 0.00  | 0.00        |      |

Supplement 10. Performance indicators for MI and OLE estimates for VOCs. Otherwise as Supplement 9.

| Performance indicators         |       | Multiple imputation |               |             |               |             |               |             |               | Optimal estimation |             |             |             |
|--------------------------------|-------|---------------------|---------------|-------------|---------------|-------------|---------------|-------------|---------------|--------------------|-------------|-------------|-------------|
|                                |       | lag0(SD)            |               | lag1(SD)    |               | lead1(SD)   |               | LL1(SD)     |               | lag0               | lag1        | lead1       | LL1         |
| <b>Acetylene</b>               |       |                     |               |             |               |             |               |             |               |                    |             |             |             |
| <i>Random</i>                  | $d_2$ | <b>0.84</b>         | <b>(0.04)</b> | 0.72        | (0.02)        | 0.76        | (0.04)        | 0.66        | (0.03)        | <b>0.73</b>        | 0.65        | 0.59        | 0.46        |
|                                | $R^2$ | <b>0.52</b>         | <b>(0.08)</b> | 0.30        | (0.04)        | 0.37        | (0.08)        | 0.19        | (0.04)        | <b>0.57</b>        | 0.44        | 0.39        | 0.23        |
|                                | MAE   | <b>0.51</b>         | <b>(0.05)</b> | 0.66        | (0.04)        | 0.60        | (0.06)        | 0.71        | (0.02)        | <b>0.46</b>        | 0.55        | 0.60        | 0.68        |
| <i>Block 5</i>                 | $d_2$ | <b>0.86</b>         | <b>(0.02)</b> | 0.76        | (0.03)        | 0.81        | (0.04)        | 0.70        | (0.03)        | <b>0.69</b>        | 0.60        | 0.58        | 0.52        |
|                                | $R^2$ | <b>0.57</b>         | <b>(0.05)</b> | 0.37        | (0.04)        | 0.44        | (0.08)        | 0.28        | (0.04)        | <b>0.46</b>        | 0.36        | 0.35        | 0.21        |
|                                | MAE   | <b>0.46</b>         | <b>(0.02)</b> | 0.57        | (0.03)        | 0.59        | (0.02)        | 0.62        | (0.03)        | <b>0.47</b>        | 0.55        | 0.56        | 0.66        |
| <i>Row-wise</i>                | $d_2$ | <b>0.65</b>         | <b>(0.06)</b> | 0.65        | (0.03)        | 0.63        | (0.07)        | 0.62        | (0.05)        | 0.45               | 0.38        | <b>0.46</b> | 0.37        |
|                                | $R^2$ | <b>0.19</b>         | <b>(0.08)</b> | 0.18        | (0.04)        | 0.16        | (0.08)        | 0.15        | (0.05)        | 0.09               | 0.06        | <b>0.11</b> | 0.04        |
|                                | MAE   | <b>0.63</b>         | <b>(0.05)</b> | 0.67        | (0.06)        | 0.69        | (0.06)        | 0.72        | (0.05)        | 0.60               | 0.61        | <b>0.58</b> | 0.63        |
| <b>Benzene</b>                 |       |                     |               |             |               |             |               |             |               |                    |             |             |             |
| <i>Random</i>                  | $d_2$ | <b>0.87</b>         | <b>(0.03)</b> | 0.84        | (0.01)        | 0.87        | (0.02)        | 0.84        | (0.02)        | <b>0.89</b>        | 0.85        | 0.84        | 0.79        |
|                                | $R^2$ | <b>0.61</b>         | <b>(0.08)</b> | 0.52        | (0.03)        | 0.59        | (0.06)        | 0.52        | (0.05)        | <b>0.71</b>        | 0.63        | 0.63        | 0.52        |
|                                | MAE   | <b>0.17</b>         | <b>(0.02)</b> | 0.18        | (0.01)        | 0.17        | (0.01)        | 0.18        | (0.01)        | <b>0.03</b>        | 0.04        | 0.04        | 0.04        |
| <i>Block 5</i>                 | $d_2$ | 0.85                | (0.02)        | <b>0.85</b> | <b>(0.04)</b> | 0.84        | (0.04)        | 0.83        | (0.02)        | <b>0.88</b>        | 0.85        | 0.84        | 0.88        |
|                                | $R^2$ | 0.55                | (0.05)        | <b>0.56</b> | <b>(0.09)</b> | 0.54        | (0.10)        | 0.49        | (0.03)        | <b>0.68</b>        | 0.62        | 0.60        | 0.65        |
|                                | MAE   | 0.19                | (0.02)        | <b>0.19</b> | <b>(0.02)</b> | 0.19        | (0.02)        | 0.20        | (0.02)        | <b>0.03</b>        | 0.04        | 0.04        | 0.04        |
| <i>Row-wise</i>                | $d_2$ | <b>0.64</b>         | <b>(0.04)</b> | 0.63        | (0.03)        | 0.58        | (0.06)        | 0.57        | (0.06)        | 0.63               | <b>0.65</b> | 0.64        | 0.53        |
|                                | $R^2$ | <b>0.20</b>         | <b>(0.05)</b> | 0.18        | (0.03)        | 0.13        | (0.05)        | 0.12        | (0.05)        | 0.22               | <b>0.25</b> | 0.24        | 0.17        |
|                                | MAE   | <b>0.26</b>         | <b>(0.02)</b> | 0.28        | (0.02)        | 0.28        | (0.03)        | 0.27        | (0.01)        | 0.07               | <b>0.07</b> | 0.07        | 0.08        |
| <b>1,3-Butadiene</b>           |       |                     |               |             |               |             |               |             |               |                    |             |             |             |
| <i>Random</i>                  | $d_2$ | <b>0.89</b>         | <b>(0.02)</b> | 0.89        | (0.01)        | 0.87        | (0.01)        | 0.87        | (0.02)        | <b>0.78</b>        | 0.74        | 0.62        | 0.63        |
|                                | $R^2$ | <b>0.65</b>         | <b>(0.06)</b> | 0.65        | (0.03)        | 0.58        | (0.03)        | 0.58        | (0.04)        | <b>0.68</b>        | 0.67        | 0.52        | 0.52        |
|                                | MAE   | <b>0.03</b>         | <b>(0.00)</b> | 0.03        | (0.00)        | 0.03        | (0.00)        | 0.03        | (0.00)        | <b>0.00</b>        | 0.00        | 0.00        | 0.00        |
| <i>Block 5</i>                 | $d_2$ | 0.88                | (0.02)        | 0.86        | (0.03)        | 0.88        | (0.02)        | <b>0.88</b> | <b>(0.01)</b> | 0.76               | 0.75        | 0.77        | <b>0.78</b> |
|                                | $R^2$ | 0.61                | (0.06)        | 0.56        | (0.08)        | 0.59        | (0.05)        | <b>0.61</b> | <b>(0.04)</b> | 0.50               | 0.49        | 0.53        | <b>0.56</b> |
|                                | MAE   | 0.03                | (0.00)        | 0.03        | (0.00)        | 0.03        | (0.00)        | <b>0.03</b> | <b>(0.00)</b> | 0.00               | 0.00        | 0.00        | <b>0.00</b> |
| <i>Row-wise</i>                | $d_2$ | <b>0.58</b>         | <b>(0.04)</b> | 0.50        | (0.03)        | 0.52        | (0.08)        | 0.46        | (0.05)        | <b>0.49</b>        | 0.43        | 0.41        | 0.30        |
|                                | $R^2$ | <b>0.09</b>         | <b>(0.03)</b> | 0.05        | (0.03)        | 0.07        | (0.05)        | 0.03        | (0.03)        | <b>0.13</b>        | 0.08        | 0.07        | 0.03        |
|                                | MAE   | <b>0.04</b>         | <b>(0.00)</b> | 0.04        | (0.00)        | 0.05        | (0.00)        | 0.04        | (0.00)        | <b>0.00</b>        | 0.00        | 0.00        | 0.00        |
| <b>Dichlorodifluoromethane</b> |       |                     |               |             |               |             |               |             |               |                    |             |             |             |
| <i>Random</i>                  | $d_2$ | 0.62                | (0.06)        | 0.58        | (0.07)        | 0.63        | (0.05)        | <b>0.64</b> | <b>(0.04)</b> | <b>0.52</b>        | 0.33        | 0.41        | <b>0.52</b> |
|                                | $R^2$ | 0.15                | (0.06)        | 0.12        | (0.07)        | 0.17        | (0.04)        | <b>0.18</b> | <b>(0.06)</b> | <b>0.12</b>        | 0.04        | 0.12        | <b>0.25</b> |
|                                | MAE   | 0.06                | (0.01)        | 0.06        | (0.01)        | 0.06        | (0.00)        | <b>0.06</b> | <b>(0.01)</b> | <b>0.01</b>        | 0.01        | 0.00        | <b>0.00</b> |
| <i>Block 5</i>                 | $d_2$ | 0.59                | (0.03)        | 0.57        | (0.06)        | <b>0.59</b> | <b>(0.02)</b> | 0.58        | (0.07)        | 0.35               | 0.34        | 0.37        | <b>0.44</b> |
|                                | $R^2$ | 0.16                | (0.02)        | 0.14        | (0.07)        | <b>0.17</b> | <b>(0.03)</b> | 0.15        | (0.07)        | 0.09               | 0.03        | 0.11        | <b>0.18</b> |
|                                | MAE   | 0.06                | (0.00)        | 0.07        | (0.00)        | <b>0.07</b> | <b>(0.01)</b> | 0.07        | (0.01)        | 0.01               | 0.01        | 0.01        | <b>0.01</b> |
| <i>Row-wise</i>                | $d_2$ | 0.44                | (0.12)        | 0.44        | (0.07)        | <b>0.45</b> | <b>(0.05)</b> | 0.38        | (0.09)        | 0.29               | <b>0.46</b> | 0.22        | 0.29        |
|                                | $R^2$ | 0.04                | (0.05)        | 0.03        | (0.04)        | <b>0.03</b> | <b>(0.03)</b> | 0.02        | (0.02)        | 0.03               | <b>0.16</b> | 0.00        | 0.03        |
|                                | MAE   | 0.08                | (0.01)        | 0.08        | (0.00)        | <b>0.09</b> | <b>(0.01)</b> | 0.09        | (0.01)        | 0.01               | <b>0.01</b> | 0.01        | 0.01        |

| Performance indicators     |                | Multiple imputation |                    |                    |                    |             |                    |             |                    | Optimal estimation |             |       |             |
|----------------------------|----------------|---------------------|--------------------|--------------------|--------------------|-------------|--------------------|-------------|--------------------|--------------------|-------------|-------|-------------|
|                            |                | lag0(SD)            |                    | lag1(SD)           |                    | lead1(SD)   |                    | LL1(SD)     |                    | lag0               | lag1        | lead1 | LL1         |
| <b>Ethylbenzene</b>        |                |                     |                    |                    |                    |             |                    |             |                    |                    |             |       |             |
| <i>Random</i>              | d <sub>2</sub> | 0.99 (0.00)         | <b>0.99 (0.00)</b> | 0.99 (0.00)        | <b>0.99 (0.00)</b> | 0.99 (0.00) | 0.99 (0.00)        | 0.99 (0.00) | 0.99 (0.00)        | 0.88               | <b>0.89</b> | 0.88  | 0.87        |
|                            | R <sup>2</sup> | 0.96 (0.01)         | <b>0.96 (0.00)</b> | 0.95 (0.01)        | <b>0.95 (0.01)</b> | 0.96 (0.01) | 0.96 (0.01)        | 0.96 (0.01) | 0.96 (0.01)        | 0.76               | <b>0.76</b> | 0.75  | 0.74        |
|                            | MAE            | 0.02 (0.00)         | <b>0.01 (0.00)</b> | 0.02 (0.00)        | <b>0.02 (0.00)</b> | 0.02 (0.00) | 0.02 (0.00)        | 0.02 (0.00) | 0.02 (0.00)        | 0.00               | <b>0.00</b> | 0.00  | 0.00        |
| <i>Block 5</i>             | d <sub>2</sub> | 0.99 (0.00)         | 0.99 (0.00)        | <b>0.99 (0.00)</b> | <b>0.99 (0.00)</b> | 0.99 (0.00) | <b>0.99 (0.00)</b> | 0.99 (0.00) | 0.99 (0.00)        | <b>0.90</b>        | 0.89        | 0.85  | 0.79        |
|                            | R <sup>2</sup> | 0.97 (0.00)         | 0.97 (0.00)        | <b>0.97 (0.00)</b> | <b>0.97 (0.00)</b> | 0.97 (0.00) | <b>0.97 (0.00)</b> | 0.97 (0.00) | 0.97 (0.00)        | <b>0.90</b>        | 0.87        | 0.86  | 0.71        |
|                            | MAE            | 0.02 (0.00)         | 0.02 (0.00)        | <b>0.01 (0.00)</b> | <b>0.01 (0.00)</b> | 0.02 (0.00) | <b>0.01 (0.00)</b> | 0.02 (0.00) | 0.02 (0.00)        | <b>0.00</b>        | 0.00        | 0.00  | 0.01        |
| <i>Row-wise</i>            | d <sub>2</sub> | 0.58 (0.09)         | 0.58 (0.05)        | 0.54 (0.10)        | <b>0.60 (0.08)</b> | 0.54 (0.10) | <b>0.60 (0.08)</b> | 0.54 (0.10) | <b>0.60 (0.08)</b> | 0.51               | <b>0.62</b> | 0.51  | 0.61        |
|                            | R <sup>2</sup> | 0.12 (0.07)         | 0.10 (0.05)        | 0.08 (0.07)        | <b>0.13 (0.08)</b> | 0.08 (0.07) | <b>0.13 (0.08)</b> | 0.08 (0.07) | <b>0.13 (0.08)</b> | 0.06               | <b>0.18</b> | 0.07  | 0.15        |
|                            | MAE            | 0.10 (0.01)         | 0.10 (0.01)        | 0.10 (0.01)        | <b>0.10 (0.01)</b> | 0.10 (0.01) | <b>0.10 (0.01)</b> | 0.10 (0.01) | <b>0.10 (0.01)</b> | 0.01               | <b>0.01</b> | 0.01  | 0.01        |
| <b>Methyl ethyl ketone</b> |                |                     |                    |                    |                    |             |                    |             |                    |                    |             |       |             |
| <i>Random</i>              | d <sub>2</sub> | 0.74 (0.04)         | 0.75 (0.05)        | 0.71 (0.02)        | 0.75 (0.05)        | 0.71 (0.02) | 0.75 (0.05)        | 0.75 (0.05) | 0.75 (0.05)        | 0.70               | 0.70        | 0.57  | <b>0.70</b> |
|                            | R <sup>2</sup> | 0.32 (0.06)         | 0.34 (0.08)        | 0.25 (0.04)        | 0.33 (0.08)        | 0.25 (0.04) | 0.33 (0.08)        | 0.33 (0.08) | 0.33 (0.08)        | 0.36               | 0.38        | 0.18  | <b>0.40</b> |
|                            | MAE            | 0.38 (0.04)         | 0.38 (0.02)        | 0.40 (0.02)        | 0.39 (0.02)        | 0.40 (0.02) | 0.39 (0.02)        | 0.39 (0.02) | 0.39 (0.02)        | 0.18               | 0.18        | 0.23  | <b>0.17</b> |
| <i>Block 5</i>             | d <sub>2</sub> | <b>0.65 (0.05)</b>  | 0.64 (0.06)        | 0.63 (0.05)        | 0.62 (0.07)        | 0.63 (0.05) | 0.62 (0.07)        | 0.62 (0.07) | 0.62 (0.07)        | 0.74               | <b>0.75</b> | 0.73  | 0.73        |
|                            | R <sup>2</sup> | <b>0.20 (0.06)</b>  | 0.18 (0.07)        | 0.19 (0.06)        | 0.16 (0.07)        | 0.19 (0.06) | 0.16 (0.07)        | 0.16 (0.07) | 0.16 (0.07)        | 0.36               | <b>0.38</b> | 0.34  | 0.35        |
|                            | MAE            | <b>0.40 (0.03)</b>  | 0.40 (0.03)        | 0.45 (0.05)        | 0.41 (0.03)        | 0.45 (0.05) | 0.41 (0.03)        | 0.41 (0.03) | 0.41 (0.03)        | 0.12               | <b>0.12</b> | 0.14  | 0.12        |
| <i>Row-wise</i>            | d <sub>2</sub> | <b>0.71 (0.02)</b>  | 0.69 (0.06)        | 0.65 (0.03)        | 0.68 (0.07)        | 0.65 (0.03) | 0.68 (0.07)        | 0.68 (0.07) | 0.68 (0.07)        | <b>0.82</b>        | 0.80        | 0.81  | 0.80        |
|                            | R <sup>2</sup> | <b>0.28 (0.03)</b>  | 0.25 (0.10)        | 0.18 (0.05)        | 0.25 (0.10)        | 0.18 (0.05) | 0.25 (0.10)        | 0.25 (0.10) | 0.25 (0.10)        | <b>0.49</b>        | 0.46        | 0.48  | 0.45        |
|                            | MAE            | <b>0.37 (0.02)</b>  | 0.38 (0.03)        | 0.38 (0.04)        | 0.39 (0.03)        | 0.38 (0.04) | 0.39 (0.03)        | 0.39 (0.03) | 0.39 (0.03)        | <b>0.10</b>        | 0.10        | 0.10  | 0.11        |
| <b>m,p-Xylene</b>          |                |                     |                    |                    |                    |             |                    |             |                    |                    |             |       |             |
| <i>Random</i>              | d <sub>2</sub> | 0.99 (0.00)         | 0.99 (0.00)        | <b>0.99 (0.00)</b> | <b>0.99 (0.00)</b> | 0.99 (0.00) | <b>0.99 (0.00)</b> | 0.99 (0.00) | 0.99 (0.00)        | 0.88               | <b>0.88</b> | 0.88  | 0.88        |
|                            | R <sup>2</sup> | 0.97 (0.01)         | 0.97 (0.00)        | <b>0.97 (0.00)</b> | <b>0.97 (0.00)</b> | 0.97 (0.00) | <b>0.97 (0.00)</b> | 0.97 (0.00) | 0.97 (0.00)        | 0.77               | <b>0.78</b> | 0.78  | 0.78        |
|                            | MAE            | 0.04 (0.01)         | 0.04 (0.01)        | <b>0.04 (0.01)</b> | <b>0.04 (0.01)</b> | 0.04 (0.01) | <b>0.04 (0.01)</b> | 0.04 (0.01) | 0.04 (0.01)        | 0.03               | <b>0.03</b> | 0.03  | 0.03        |
| <i>Block 5</i>             | d <sub>2</sub> | 0.99 (0.00)         | <b>0.99 (0.00)</b> | 0.99 (0.00)        | 0.99 (0.00)        | 0.99 (0.00) | 0.99 (0.00)        | 0.99 (0.00) | 0.99 (0.00)        | 0.87               | 0.87        | 0.86  | <b>0.87</b> |
|                            | R <sup>2</sup> | 0.97 (0.01)         | <b>0.97 (0.00)</b> | 0.97 (0.00)        | 0.97 (0.01)        | 0.97 (0.00) | 0.97 (0.01)        | 0.97 (0.01) | 0.97 (0.01)        | 0.74               | 0.74        | 0.74  | <b>0.75</b> |
|                            | MAE            | 0.04 (0.01)         | <b>0.04 (0.00)</b> | 0.04 (0.00)        | 0.04 (0.00)        | 0.04 (0.00) | 0.04 (0.00)        | 0.04 (0.00) | 0.04 (0.00)        | 0.03               | 0.03        | 0.03  | <b>0.03</b> |
| <i>Row-wise</i>            | d <sub>2</sub> | 0.50 (0.05)         | 0.56 (0.05)        | 0.52 (0.05)        | <b>0.60 (0.04)</b> | 0.52 (0.05) | <b>0.60 (0.04)</b> | 0.52 (0.05) | <b>0.60 (0.04)</b> | 0.50               | <b>0.55</b> | 0.52  | 0.45        |
|                            | R <sup>2</sup> | 0.05 (0.03)         | 0.08 (0.03)        | 0.06 (0.03)        | <b>0.13 (0.04)</b> | 0.06 (0.03) | <b>0.13 (0.04)</b> | 0.06 (0.03) | <b>0.13 (0.04)</b> | 0.06               | <b>0.12</b> | 0.08  | 0.06        |
|                            | MAE            | 0.31 (0.02)         | 0.32 (0.03)        | 0.31 (0.02)        | <b>0.28 (0.02)</b> | 0.31 (0.02) | <b>0.28 (0.02)</b> | 0.31 (0.02) | <b>0.28 (0.02)</b> | 0.11               | <b>0.10</b> | 0.10  | 0.10        |
| <b>n-Octane</b>            |                |                     |                    |                    |                    |             |                    |             |                    |                    |             |       |             |
| <i>Random</i>              | d <sub>2</sub> | <b>0.52 (0.04)</b>  | 0.52 (0.04)        | 0.53 (0.09)        | 0.47 (0.06)        | 0.53 (0.09) | 0.47 (0.06)        | 0.47 (0.06) | 0.47 (0.06)        | 0.32               | 0.32        | 0.42  | <b>0.48</b> |
|                            | R <sup>2</sup> | <b>0.06 (0.03)</b>  | 0.06 (0.03)        | 0.07 (0.07)        | 0.04 (0.05)        | 0.07 (0.07) | 0.04 (0.05)        | 0.04 (0.05) | 0.04 (0.05)        | 0.01               | 0.01        | 0.01  | <b>0.04</b> |
|                            | MAE            | <b>0.04 (0.00)</b>  | 0.04 (0.00)        | 0.04 (0.01)        | 0.04 (0.00)        | 0.04 (0.01) | 0.04 (0.00)        | 0.04 (0.00) | 0.04 (0.00)        | 0.00               | 0.00        | 0.00  | <b>0.00</b> |
| <i>Block 5</i>             | d <sub>2</sub> | 0.53 (0.05)         | 0.53 (0.05)        | <b>0.57 (0.05)</b> | 0.44 (0.06)        | 0.53 (0.05) | 0.44 (0.06)        | 0.44 (0.06) | 0.44 (0.06)        | 0.34               | 0.34        | 0.38  | <b>0.39</b> |
|                            | R <sup>2</sup> | 0.06 (0.05)         | 0.06 (0.05)        | <b>0.10 (0.05)</b> | 0.02 (0.01)        | 0.06 (0.05) | 0.02 (0.01)        | 0.02 (0.01) | 0.02 (0.01)        | 0.01               | 0.01        | 0.02  | <b>0.01</b> |
|                            | MAE            | 0.04 (0.00)         | 0.04 (0.00)        | <b>0.04 (0.00)</b> | 0.05 (0.00)        | 0.04 (0.00) | 0.05 (0.00)        | 0.05 (0.00) | 0.05 (0.00)        | 0.00               | 0.00        | 0.00  | <b>0.00</b> |
| <i>Row-wise</i>            | d <sub>2</sub> | 0.40 (0.06)         | <b>0.38 (0.08)</b> | 0.35 (0.10)        | 0.37 (0.12)        | 0.35 (0.10) | 0.37 (0.12)        | 0.37 (0.12) | 0.37 (0.12)        | 0.26               | <b>0.31</b> | 0.26  | 0.26        |
|                            | R <sup>2</sup> | 0.01 (0.01)         | <b>0.01 (0.02)</b> | 0.01 (0.01)        | 0.03 (0.03)        | 0.01 (0.01) | 0.03 (0.03)        | 0.03 (0.03) | 0.03 (0.03)        | 0.01               | <b>0.00</b> | 0.01  | 0.01        |
|                            | MAE            | 0.05 (0.00)         | <b>0.05 (0.00)</b> | 0.02 (0.00)        | 0.04 (0.00)        | 0.02 (0.00) | 0.04 (0.00)        | 0.04 (0.00) | 0.04 (0.00)        | 0.00               | <b>0.00</b> | 0.00  | 0.00        |



| Performance indicators        |                | Multiple imputation |               |             |               |           |        |             |               | Optimal estimation |             |             |             |
|-------------------------------|----------------|---------------------|---------------|-------------|---------------|-----------|--------|-------------|---------------|--------------------|-------------|-------------|-------------|
|                               |                | lag0(SD)            |               | lag1(SD)    |               | lead1(SD) |        | LL1(SD)     |               | lag0               | lag1        | lead1       | LL1         |
| <b>o-Xylene</b>               |                |                     |               |             |               |           |        |             |               |                    |             |             |             |
| <i>Random</i>                 | d <sub>2</sub> | <b>0.98</b>         | <b>(0.00)</b> | 0.98        | (0.00)        | 0.98      | (0.00) | 0.98        | (0.00)        | 0.86               | 0.86        | 0.83        | <b>0.94</b> |
|                               | R <sup>2</sup> | <b>0.94</b>         | <b>(0.01)</b> | 0.94        | (0.01)        | 0.92      | (0.01) | 0.93        | (0.01)        | 0.89               | 0.89        | 0.85        | <b>0.92</b> |
|                               | MAE            | <b>0.03</b>         | <b>(0.00)</b> | 0.03        | (0.00)        | 0.03      | (0.00) | 0.03        | (0.00)        | 0.01               | 0.01        | 0.01        | <b>0.00</b> |
| <i>Block 5</i>                | d <sub>2</sub> | <b>0.98</b>         | <b>(0.00)</b> | 0.98        | (0.00)        | 0.98      | (0.00) | 0.98        | (0.00)        | 0.87               | 0.88        | 0.84        | <b>0.93</b> |
|                               | R <sup>2</sup> | <b>0.94</b>         | <b>(0.02)</b> | 0.93        | (0.01)        | 0.93      | (0.01) | 0.92        | (0.01)        | 0.90               | 0.90        | 0.87        | <b>0.89</b> |
|                               | MAE            | <b>0.03</b>         | <b>(0.00)</b> | 0.03        | (0.00)        | 0.03      | (0.00) | 0.03        | (0.00)        | 0.01               | 0.01        | 0.01        | <b>0.00</b> |
| <i>Row-wise</i>               | d <sub>2</sub> | 0.60                | (0.08)        | <b>0.63</b> | <b>(0.05)</b> | 0.59      | (0.06) | 0.63        | (0.08)        | 0.60               | 0.63        | 0.55        | <b>0.64</b> |
|                               | R <sup>2</sup> | 0.15                | (0.08)        | <b>0.17</b> | <b>(0.06)</b> | 0.12      | (0.06) | 0.17        | (0.09)        | 0.22               | 0.21        | 0.13        | <b>0.24</b> |
|                               | MAE            | 0.13                | (0.01)        | <b>0.12</b> | <b>(0.01)</b> | 0.12      | (0.01) | 0.12        | (0.01)        | 0.02               | 0.02        | 0.02        | <b>0.02</b> |
| <b>Propylene</b>              |                |                     |               |             |               |           |        |             |               |                    |             |             |             |
| <i>Random</i>                 | d <sub>2</sub> | 0.45                | (0.04)        | 0.41        | (0.11)        | 0.42      | (0.06) | <b>0.45</b> | <b>(0.06)</b> | <b>0.66</b>        | 0.56        | 0.61        | 0.65        |
|                               | R <sup>2</sup> | 0.07                | (0.03)        | 0.06        | (0.08)        | 0.04      | (0.04) | <b>0.07</b> | <b>(0.05)</b> | <b>0.23</b>        | 0.10        | 0.15        | 0.19        |
|                               | MAE            | 1.28                | (0.15)        | 1.30        | (0.10)        | 1.30      | (0.15) | <b>1.24</b> | <b>(0.16)</b> | <b>0.76</b>        | 0.86        | 0.65        | 0.59        |
| <i>Block 5</i>                | d <sub>2</sub> | <b>0.47</b>         | <b>(0.11)</b> | 0.44        | (0.11)        | 0.29      | (0.05) | 0.32        | (0.04)        | <b>0.49</b>        | 0.36        | 0.28        | 0.27        |
|                               | R <sup>2</sup> | <b>0.09</b>         | <b>(0.06)</b> | 0.07        | (0.05)        | 0.01      | (0.01) | 0.01        | (0.01)        | <b>0.24</b>        | 0.12        | 0.05        | 0.04        |
|                               | MAE            | <b>1.14</b>         | <b>(0.07)</b> | 1.21        | (0.05)        | 1.33      | (0.10) | 1.27        | (0.11)        | <b>2.48</b>        | 2.79        | 3.04        | 3.09        |
| <i>Row-wise</i>               | d <sub>2</sub> | <b>0.58</b>         | <b>(0.05)</b> | 0.51        | (0.02)        | 0.54      | (0.05) | 0.44        | (0.06)        | 0.65               | 0.53        | <b>0.66</b> | 0.57        |
|                               | R <sup>2</sup> | <b>0.14</b>         | <b>(0.05)</b> | 0.07        | (0.02)        | 0.10      | (0.04) | 0.02        | (0.02)        | 0.25               | 0.14        | <b>0.27</b> | 0.19        |
|                               | MAE            | <b>1.26</b>         | <b>(0.15)</b> | 1.30        | (0.11)        | 1.23      | (0.13) | 1.30        | (0.05)        | 1.08               | 1.25        | <b>1.04</b> | 1.15        |
| <b>Tetrachloroethylene</b>    |                |                     |               |             |               |           |        |             |               |                    |             |             |             |
| <i>Random</i>                 | d <sub>2</sub> | 0.30                | (0.07)        | 0.27        | (0.03)        | 0.31      | (0.06) | <b>0.33</b> | <b>(0.06)</b> | 0.22               | <b>0.27</b> | 0.26        | 0.23        |
|                               | R <sup>2</sup> | 0.02                | (0.02)        | 0.01        | (0.01)        | 0.01      | (0.01) | <b>0.01</b> | <b>(0.02)</b> | 0.01               | <b>0.03</b> | 0.03        | 0.00        |
|                               | MAE            | 0.08                | (0.01)        | 0.08        | (0.00)        | 0.08      | (0.00) | <b>0.07</b> | <b>(0.00)</b> | 0.01               | <b>0.01</b> | 0.01        | 0.01        |
| <i>Block 5</i>                | d <sub>2</sub> | 0.39                | (0.04)        | <b>0.41</b> | <b>(0.12)</b> | 0.34      | (0.04) | 0.32        | (0.09)        | 0.27               | 0.33        | <b>0.39</b> | 0.26        |
|                               | R <sup>2</sup> | 0.01                | (0.02)        | <b>0.04</b> | <b>(0.06)</b> | 0.01      | (0.00) | 0.02        | (0.02)        | 0.02               | 0.05        | <b>0.11</b> | 0.05        |
|                               | MAE            | 0.07                | (0.01)        | <b>0.08</b> | <b>(0.01)</b> | 0.07      | (0.01) | 0.08        | (0.00)        | 0.01               | 0.01        | <b>0.01</b> | 0.01        |
| <i>Row-wise</i>               | d <sub>2</sub> | <b>0.41</b>         | <b>(0.11)</b> | 0.38        | (0.10)        | -         | -      | 0.32        | (0.06)        | <b>0.37</b>        | 0.30        | -           | 0.27        |
|                               | R <sup>2</sup> | <b>0.03</b>         | <b>(0.02)</b> | 0.02        | (0.01)        | -         | -      | 0.01        | (0.00)        | <b>0.15</b>        | 0.09        | -           | 0.08        |
|                               | MAE            | <b>0.07</b>         | <b>(0.01)</b> | 0.08        | (0.01)        | -         | -      | 0.07        | (0.01)        | <b>0.01</b>        | 0.01        | -           | 0.01        |
| <b>Trichlorofluoromethane</b> |                |                     |               |             |               |           |        |             |               |                    |             |             |             |
| <i>Random</i>                 | d <sub>2</sub> | 0.61                | (0.08)        | <b>0.62</b> | <b>(0.08)</b> | 0.61      | (0.08) | 0.57        | (0.05)        | 0.23               | 0.31        | 0.23        | <b>0.51</b> |
|                               | R <sup>2</sup> | 0.17                | (0.10)        | <b>0.17</b> | <b>(0.09)</b> | 0.17      | (0.10) | 0.12        | (0.05)        | 0.02               | 0.01        | 0.02        | <b>0.17</b> |
|                               | MAE            | 0.10                | (0.01)        | <b>0.10</b> | <b>(0.01)</b> | 0.10      | (0.01) | 0.11        | (0.01)        | 0.01               | 0.01        | 0.01        | <b>0.01</b> |
| <i>Block 5</i>                | d <sub>2</sub> | 0.47                | (0.11)        | <b>0.51</b> | <b>(0.05)</b> | 0.47      | (0.11) | 0.29        | (0.09)        | 0.39               | <b>0.47</b> | 0.39        | 0.43        |
|                               | R <sup>2</sup> | 0.10                | (0.07)        | <b>0.10</b> | <b>(0.04)</b> | 0.10      | (0.07) | 0.03        | (0.04)        | 0.04               | <b>0.10</b> | 0.04        | 0.08        |
|                               | MAE            | 0.10                | (0.02)        | <b>0.09</b> | <b>(0.01)</b> | 0.10      | (0.02) | 0.12        | (0.02)        | 0.00               | <b>0.00</b> | 0.00        | 0.00        |
| <i>Row-wise</i>               | d <sub>2</sub> | -                   | -             | 0.30        | (0.08)        | -         | -      | <b>0.34</b> | <b>(0.10)</b> | -                  | 0.34        | -           | <b>0.38</b> |
|                               | R <sup>2</sup> | -                   | -             | 0.01        | (0.01)        | -         | -      | <b>0.03</b> | <b>(0.04)</b> | -                  | 0.00        | -           | <b>0.01</b> |
|                               | MAE            | -                   | -             | 0.12        | (0.02)        | -         | -      | <b>0.12</b> | <b>(0.01)</b> | -                  | 0.01        | -           | <b>0.01</b> |

| Performance indicators           |                | Multiple imputation |               |             |               |             |               |             |               | Optimal estimation |             |             |             |
|----------------------------------|----------------|---------------------|---------------|-------------|---------------|-------------|---------------|-------------|---------------|--------------------|-------------|-------------|-------------|
|                                  |                | lag0(SD)            |               | lag1(SD)    |               | lead1(SD)   |               | LL1(SD)     |               | lag0               | lag1        | lead1       | LL1         |
| <b>Trichlorotrifluoromethane</b> |                |                     |               |             |               |             |               |             |               |                    |             |             |             |
| <i>Random</i>                    | d <sub>2</sub> | 0.42                | (0.09)        | 0.58        | (0.02)        | 0.49        | (0.06)        | <b>0.67</b> | <b>(0.04)</b> | 0.19               | <b>0.20</b> | 0.18        | 0.18        |
|                                  | R <sup>2</sup> | 0.02                | (0.04)        | 0.09        | (0.02)        | 0.03        | (0.04)        | <b>0.19</b> | <b>(0.07)</b> | 0.01               | <b>0.01</b> | 0.02        | 0.01        |
|                                  | MAE            | 0.03                | (0.00)        | 0.02        | (0.00)        | 0.02        | (0.00)        | <b>0.02</b> | <b>(0.00)</b> | 0.00               | <b>0.00</b> | 0.00        | 0.00        |
| <i>Block 5</i>                   | d <sub>2</sub> | 0.44                | (0.05)        | 0.39        | (0.04)        | 0.39        | (0.06)        | <b>0.45</b> | <b>(0.04)</b> | 0.21               | 0.18        | 0.20        | <b>0.20</b> |
|                                  | R <sup>2</sup> | 0.01                | (0.02)        | 0.00        | (0.01)        | 0.01        | (0.01)        | <b>0.01</b> | <b>(0.01)</b> | 0.01               | 0.03        | 0.01        | <b>0.01</b> |
|                                  | MAE            | 0.03                | (0.00)        | 0.03        | (0.00)        | 0.03        | (0.00)        | <b>0.03</b> | <b>(0.00)</b> | 0.00               | 0.00        | 0.00        | <b>0.00</b> |
| <i>Row-wise</i>                  | d <sub>2</sub> | 0.42                | (0.07)        | 0.56        | (0.03)        | 0.49        | (0.03)        | <b>0.59</b> | <b>(0.03)</b> | 0.18               | 0.18        | <b>0.20</b> | 0.19        |
|                                  | R <sup>2</sup> | 0.01                | (0.01)        | 0.07        | (0.02)        | 0.02        | (0.01)        | <b>0.10</b> | <b>(0.03)</b> | 0.07               | 0.06        | <b>0.03</b> | 0.04        |
|                                  | MAE            | 0.03                | (0.00)        | 0.02        | (0.00)        | 0.03        | (0.00)        | <b>0.02</b> | <b>(0.00)</b> | 0.00               | 0.00        | <b>0.00</b> | 0.00        |
| <b>1,2,4-Trimethylbenzene</b>    |                |                     |               |             |               |             |               |             |               |                    |             |             |             |
| <i>Random</i>                    | d <sub>2</sub> | <b>0.98</b>         | <b>(0.00)</b> | 0.98        | (0.00)        | 0.98        | (0.00)        | 0.98        | (0.00)        | 0.65               | <b>0.86</b> | 0.60        | 0.63        |
|                                  | R <sup>2</sup> | <b>0.92</b>         | <b>(0.01)</b> | 0.92        | (0.02)        | 0.91        | (0.02)        | 0.91        | (0.02)        | 0.52               | <b>0.69</b> | 0.44        | 0.47        |
|                                  | MAE            | <b>0.04</b>         | <b>(0.00)</b> | 0.04        | (0.00)        | 0.04        | (0.00)        | 0.04        | (0.00)        | 0.02               | <b>0.01</b> | 0.02        | 0.02        |
| <i>Block 5</i>                   | d <sub>2</sub> | 0.98                | (0.00)        | <b>0.98</b> | <b>(0.00)</b> | 0.98        | (0.00)        | 0.98        | (0.00)        | 0.63               | <b>0.88</b> | 0.72        | 0.62        |
|                                  | R <sup>2</sup> | 0.92                | (0.01)        | <b>0.93</b> | <b>(0.01)</b> | 0.93        | (0.01)        | 0.92        | (0.01)        | 0.42               | <b>0.79</b> | 0.54        | 0.41        |
|                                  | MAE            | 0.04                | (0.00)        | <b>0.04</b> | <b>(0.00)</b> | 0.04        | (0.00)        | 0.04        | (0.00)        | 0.02               | <b>0.01</b> | 0.02        | 0.02        |
| <i>Row-wise</i>                  | d <sub>2</sub> | 0.66                | (0.07)        | 0.66        | (0.03)        | 0.54        | (0.04)        | <b>0.69</b> | <b>(0.04)</b> | 0.63               | <b>0.70</b> | 0.58        | 0.67        |
|                                  | R <sup>2</sup> | 0.21                | (0.07)        | 0.20        | (0.03)        | 0.07        | (0.03)        | <b>0.25</b> | <b>(0.06)</b> | 0.24               | <b>0.33</b> | 0.17        | 0.26        |
|                                  | MAE            | 0.12                | (0.01)        | 0.12        | (0.01)        | 0.14        | (0.01)        | <b>0.12</b> | <b>(0.01)</b> | 0.02               | <b>0.02</b> | 0.02        | 0.02        |
| <b>1,3,5-Trimethylbenzene</b>    |                |                     |               |             |               |             |               |             |               |                    |             |             |             |
| <i>Random</i>                    | d <sub>2</sub> | 0.90                | (0.01)        | <b>0.91</b> | <b>(0.01)</b> | 0.90        | (0.02)        | 0.90        | (0.01)        | 0.81               | 0.81        | 0.80        | <b>0.85</b> |
|                                  | R <sup>2</sup> | 0.66                | (0.03)        | <b>0.68</b> | <b>(0.03)</b> | 0.68        | (0.06)        | 0.65        | (0.03)        | 0.51               | 0.51        | 0.48        | <b>0.55</b> |
|                                  | MAE            | 0.02                | (0.00)        | <b>0.02</b> | <b>(0.00)</b> | 0.02        | (0.00)        | 0.02        | (0.00)        | 0.00               | 0.00        | 0.00        | <b>0.00</b> |
| <i>Block 5</i>                   | d <sub>2</sub> | 0.90                | (0.01)        | <b>0.92</b> | <b>(0.01)</b> | 0.91        | (0.01)        | 0.92        | (0.01)        | 0.85               | 0.84        | 0.84        | <b>0.88</b> |
|                                  | R <sup>2</sup> | 0.67                | (0.02)        | <b>0.73</b> | <b>(0.03)</b> | 0.70        | (0.04)        | 0.72        | (0.02)        | 0.65               | 0.63        | 0.63        | <b>0.61</b> |
|                                  | MAE            | 0.02                | (0.00)        | <b>0.02</b> | <b>(0.00)</b> | 0.02        | (0.00)        | 0.02        | (0.00)        | 0.00               | 0.00        | 0.00        | <b>0.00</b> |
| <i>Row-wise</i>                  | d <sub>2</sub> | 0.58                | (0.08)        | 0.57        | (0.07)        | <b>0.59</b> | <b>(0.12)</b> | 0.56        | (0.03)        | 0.46               | 0.48        | <b>0.65</b> | 0.58        |
|                                  | R <sup>2</sup> | 0.10                | (0.06)        | 0.10        | (0.07)        | <b>0.14</b> | <b>(0.12)</b> | 0.09        | (0.03)        | 0.07               | 0.09        | <b>0.24</b> | 0.17        |
|                                  | MAE            | 0.04                | (0.00)        | 0.04        | (0.00)        | <b>0.04</b> | <b>(0.00)</b> | 0.04        | (0.00)        | 0.00               | 0.00        | <b>0.00</b> | 0.00        |
| <b>Toluene</b>                   |                |                     |               |             |               |             |               |             |               |                    |             |             |             |
| <i>Random</i>                    | d <sub>2</sub> | 0.90                | (0.02)        | 0.88        | (0.02)        | 0.89        | (0.02)        | <b>0.91</b> | <b>(0.01)</b> | 0.84               | 0.75        | 0.90        | <b>0.95</b> |
|                                  | R <sup>2</sup> | 0.68                | (0.06)        | 0.64        | (0.05)        | 0.67        | (0.05)        | <b>0.72</b> | <b>(0.04)</b> | 0.61               | 0.44        | 0.74        | <b>0.83</b> |
|                                  | MAE            | 0.35                | (0.04)        | 0.38        | (0.04)        | 0.38        | (0.04)        | <b>0.36</b> | <b>(0.03)</b> | 0.19               | 0.26        | 0.13        | <b>0.08</b> |
| <i>Block 5</i>                   | d <sub>2</sub> | <b>0.91</b>         | <b>(0.01)</b> | 0.87        | (0.01)        | 0.90        | (0.02)        | 0.89        | (0.03)        | 0.60               | 0.51        | <b>0.81</b> | 0.81        |
|                                  | R <sup>2</sup> | <b>0.70</b>         | <b>(0.03)</b> | 0.60        | (0.04)        | 0.67        | (0.05)        | 0.66        | (0.07)        | 0.38               | 0.19        | <b>0.63</b> | 0.59        |
|                                  | MAE            | <b>0.38</b>         | <b>(0.02)</b> | 0.40        | (0.03)        | 0.36        | (0.01)        | 0.36        | (0.05)        | 0.56               | 0.69        | <b>0.35</b> | 0.36        |
| <i>Row-wise</i>                  | d <sub>2</sub> | <b>0.56</b>         | <b>(0.05)</b> | 0.52        | (0.11)        | 0.55        | (0.10)        | 0.51        | (0.06)        | 0.50               | 0.46        | 0.50        | <b>0.50</b> |
|                                  | R <sup>2</sup> | <b>0.11</b>         | <b>(0.04)</b> | 0.08        | (0.09)        | 0.10        | (0.09)        | 0.08        | (0.04)        | 0.09               | 0.07        | 0.12        | <b>0.12</b> |
|                                  | MAE            | <b>0.61</b>         | <b>(0.04)</b> | 0.69        | (0.09)        | 0.68        | (0.07)        | 0.67        | (0.04)        | 0.68               | 0.69        | 0.64        | <b>0.64</b> |

Supplement 11. Performance indicators for OLE using both un-transformed and log-transformed data. Otherwise as Supplement 9.

| Performance indicators     |     | Untransformed |             |       |      | Log-transformed |             |             |             |
|----------------------------|-----|---------------|-------------|-------|------|-----------------|-------------|-------------|-------------|
|                            |     | lag0          | lag1        | lead1 | LL1  | lag0            | lag1        | lead1       | LL1         |
| <b>Acetaldehyde</b>        |     |               |             |       |      |                 |             |             |             |
| <i>Random</i>              | d2  | 0.86          | <b>0.89</b> | 0.74  | 0.88 | 0.78            | 0.80        | 0.78        | <b>0.83</b> |
|                            | R2  | 0.69          | <b>0.72</b> | 0.51  | 0.70 | 0.62            | 0.66        | 0.62        | <b>0.69</b> |
|                            | MAE | 0.30          | <b>0.26</b> | 0.46  | 0.28 | 0.01            | 0.00        | 0.00        | <b>0.00</b> |
| <i>Row-wise</i>            | d2  | <b>0.67</b>   | 0.63        | 0.47  | 0.46 | <b>0.42</b>     | 0.35        | 0.35        | 0.36        |
|                            | R2  | <b>0.32</b>   | 0.26        | 0.09  | 0.11 | <b>0.06</b>     | 0.02        | 0.01        | 0.03        |
|                            | MAE | <b>0.62</b>   | 0.66        | 0.83  | 0.79 | <b>0.00</b>     | 0.00        | 0.00        | 0.00        |
| <b>Benzaldehyde</b>        |     |               |             |       |      |                 |             |             |             |
| <i>Random</i>              | d2  | <b>0.88</b>   | 0.82        | 0.77  | 0.83 | <b>0.65</b>     | 0.55        | 0.76        | 0.59        |
|                            | R2  | <b>0.62</b>   | 0.48        | 0.44  | 0.51 | <b>0.34</b>     | 0.19        | 0.42        | 0.35        |
|                            | MAE | <b>0.00</b>   | 0.00        | 0.00  | 0.00 | <b>0.00</b>     | 0.00        | 0.00        | 0.00        |
| <i>Row-wise</i>            | d2  | 0.50          | <b>0.57</b> | 0.25  | 0.31 | <b>0.55</b>     | 0.53        | 0.29        | 0.32        |
|                            | R2  | 0.07          | <b>0.13</b> | 0.02  | 0.00 | <b>0.14</b>     | 0.12        | 0.00        | 0.00        |
|                            | MAE | 0.00          | <b>0.00</b> | 0.00  | 0.00 | <b>0.00</b>     | 0.00        | 0.00        | 0.00        |
| <b>Formaldehyde</b>        |     |               |             |       |      |                 |             |             |             |
| <i>Random</i>              | d2  | <b>0.86</b>   | 0.82        | 0.84  | 0.83 | 0.69            | 0.57        | 0.65        | <b>0.70</b> |
|                            | R2  | <b>0.63</b>   | 0.62        | 0.69  | 0.63 | 0.48            | 0.30        | 0.45        | <b>0.37</b> |
|                            | MAE | <b>0.72</b>   | 0.78        | 0.69  | 0.77 | 0.00            | 0.00        | 0.00        | <b>0.00</b> |
| <i>Row-wise</i>            | d2  | 0.52          | <b>0.54</b> | 0.33  | 0.33 | <b>0.41</b>     | 0.36        | 0.19        | 0.19        |
|                            | R2  | 0.09          | <b>0.11</b> | 0.00  | 0.00 | <b>0.09</b>     | 0.02        | 0.02        | 0.02        |
|                            | MAE | 2.37          | <b>2.31</b> | 2.65  | 2.65 | <b>0.58</b>     | 0.00        | 0.00        | 0.00        |
| <b>Benzene</b>             |     |               |             |       |      |                 |             |             |             |
| <i>Random</i>              | d2  | <b>0.89</b>   | 0.85        | 0.84  | 0.79 | <b>0.61</b>     | 0.43        | 0.45        | 0.41        |
|                            | R2  | <b>0.71</b>   | 0.63        | 0.63  | 0.52 | <b>0.22</b>     | 0.08        | 0.10        | 0.07        |
|                            | MAE | <b>0.03</b>   | 0.04        | 0.04  | 0.04 | <b>0.00</b>     | 0.00        | 0.00        | 0.00        |
| <i>Row-wise</i>            | d2  | 0.63          | <b>0.65</b> | 0.64  | 0.53 | 0.70            | <b>0.71</b> | 0.70        | 0.69        |
|                            | R2  | 0.22          | <b>0.25</b> | 0.24  | 0.17 | 0.30            | <b>0.32</b> | 0.30        | 0.29        |
|                            | MAE | 0.07          | <b>0.07</b> | 0.07  | 0.08 | 0.00            | <b>0.00</b> | 0.00        | 0.00        |
| <b>1,3-Butadiene</b>       |     |               |             |       |      |                 |             |             |             |
| <i>Random</i>              | d2  | <b>0.78</b>   | 0.74        | 0.62  | 0.63 | <b>0.53</b>     | 0.30        | 0.29        | 0.29        |
|                            | R2  | <b>0.68</b>   | 0.67        | 0.52  | 0.52 | <b>0.16</b>     | 0.03        | 0.02        | 0.02        |
|                            | MAE | <b>0.00</b>   | 0.00        | 0.00  | 0.00 | <b>0.00</b>     | 0.00        | 0.00        | 0.00        |
| <i>Row-wise</i>            | d2  | <b>0.49</b>   | 0.43        | 0.41  | 0.30 | <b>0.56</b>     | 0.49        | 0.48        | 0.45        |
|                            | R2  | <b>0.13</b>   | 0.08        | 0.07  | 0.03 | <b>0.16</b>     | 0.13        | 0.09        | 0.06        |
|                            | MAE | <b>0.00</b>   | 0.00        | 0.00  | 0.00 | <b>0.00</b>     | 0.00        | 0.00        | 0.00        |
| <b>Tetrachloroethylene</b> |     |               |             |       |      |                 |             |             |             |
| <i>Random</i>              | d2  | 0.22          | <b>0.27</b> | 0.26  | 0.23 | 0.32            | 0.38        | <b>0.55</b> | 0.34        |
|                            | R2  | 0.01          | <b>0.03</b> | 0.03  | 0.00 | 0.04            | 0.17        | <b>0.30</b> | 0.09        |
|                            | MAE | 0.01          | <b>0.01</b> | 0.01  | 0.01 | 0.00            | 0.00        | <b>0.00</b> | 0.00        |
| <i>Row-wise</i>            | d2  | <b>0.37</b>   | 0.30        | -     | 0.27 | <b>0.48</b>     | 0.37        | -           | 0.37        |
|                            | R2  | <b>0.15</b>   | 0.09        | -     | 0.08 | <b>0.17</b>     | 0.07        | -           | 0.08        |
|                            | MAE | <b>0.01</b>   | 0.01        | -     | 0.01 | <b>0.00</b>     | 0.00        | -           | 0.00        |

Supplement 12. Performance indicators for MI using both untransformed and log-transformed data.

Otherwise as Supplement 9.

| Performance indicators     |                | Un-transformed |               |             |               |             |               |             |               | Log-transformed |               |             |               |             |               |         |        |
|----------------------------|----------------|----------------|---------------|-------------|---------------|-------------|---------------|-------------|---------------|-----------------|---------------|-------------|---------------|-------------|---------------|---------|--------|
|                            |                | lag0(SD)       |               | lag1(SD)    |               | lead1(SD)   |               | LL1(SD)     |               | lag0(SD)        |               | lag1(SD)    |               | lead1(SD)   |               | LL1(SD) |        |
| <b>Acetaldehyde</b>        |                |                |               |             |               |             |               |             |               |                 |               |             |               |             |               |         |        |
| <i>Random</i>              | d <sub>2</sub> | 0.95           | (0.01)        | 0.95        | (0.01)        | 0.95        | (0.01)        | <b>0.95</b> | <b>(0.00)</b> | <b>0.93</b>     | <b>(0.01)</b> | 0.92        | (0.02)        | 0.92        | (0.03)        | 0.93    | (0.01) |
|                            | R <sup>2</sup> | 0.83           | (0.02)        | 0.80        | (0.02)        | 0.83        | (0.02)        | <b>0.83</b> | <b>(0.01)</b> | <b>0.79</b>     | <b>(0.04)</b> | 0.75        | (0.06)        | 0.76        | (0.07)        | 0.77    | (0.03) |
|                            | MAE            | 0.29           | (0.03)        | 0.30        | (0.03)        | 0.30        | (0.02)        | <b>0.30</b> | <b>(0.01)</b> | <b>0.31</b>     | <b>(0.03)</b> | 0.31        | (0.04)        | 0.32        | (0.05)        | 0.30    | (0.02) |
| <i>Row-wise</i>            | d <sub>2</sub> | 0.58           | (0.05)        | <b>0.67</b> | <b>(0.04)</b> | 0.51        | (0.05)        | 0.63        | (0.06)        | 0.29            | (0.19)        | <b>0.31</b> | <b>(0.17)</b> | 0.33        | (0.13)        | 0.34    | (0.09) |
|                            | R <sup>2</sup> | 0.11           | (0.05)        | <b>0.20</b> | <b>(0.06)</b> | 0.04        | (0.02)        | 0.14        | (0.08)        | 0.04            | (0.06)        | <b>0.10</b> | <b>(0.08)</b> | 0.02        | (0.03)        | 0.04    | (0.03) |
|                            | MAE            | 0.87           | (0.08)        | <b>0.85</b> | <b>(0.12)</b> | 0.91        | (0.04)        | 0.87        | (0.06)        | 1.56            | (0.48)        | <b>1.53</b> | <b>(0.51)</b> | 1.32        | (0.25)        | 1.34    | (0.15) |
| <b>Benzaldehyde</b>        |                |                |               |             |               |             |               |             |               |                 |               |             |               |             |               |         |        |
| <i>Random</i>              | d <sub>2</sub> | 0.80           | (0.03)        | <b>0.83</b> | <b>(0.02)</b> | 0.76        | (0.05)        | 0.76        | (0.01)        | <b>0.85</b>     | <b>(0.05)</b> | 0.78        | (0.04)        | 0.67        | (0.08)        | 0.69    | (0.12) |
|                            | R <sup>2</sup> | 0.46           | (0.07)        | <b>0.55</b> | <b>(0.03)</b> | 0.38        | (0.10)        | 0.38        | (0.03)        | <b>0.57</b>     | <b>(0.10)</b> | 0.41        | (0.07)        | 0.27        | (0.08)        | 0.28    | (0.11) |
|                            | MAE            | 0.02           | (0.00)        | <b>0.02</b> | <b>(0.00)</b> | 0.03        | (0.00)        | 0.03        | (0.00)        | <b>0.02</b>     | <b>(0.00)</b> | 0.02        | (0.00)        | 0.02        | (0.00)        | 0.02    | (0.00) |
| <i>Row-wise</i>            | d <sub>2</sub> | 0.48           | (0.06)        | <b>0.54</b> | <b>(0.03)</b> | 0.35        | (0.05)        | 0.38        | (0.05)        | 0.41            | (0.09)        | <b>0.43</b> | <b>(0.12)</b> | 0.26        | (0.06)        | 0.33    | (0.06) |
|                            | R <sup>2</sup> | 0.05           | (0.05)        | <b>0.09</b> | <b>(0.02)</b> | 0.01        | (0.01)        | 0.00        | (0.01)        | 0.04            | (0.05)        | <b>0.08</b> | <b>(0.04)</b> | 0.01        | (0.01)        | 0.00    | (0.00) |
|                            | MAE            | 0.04           | (0.00)        | <b>0.04</b> | <b>(0.00)</b> | 0.05        | (0.00)        | 0.05        | (0.00)        | 0.04            | (0.00)        | <b>0.04</b> | <b>(0.02)</b> | 0.05        | (0.00)        | 0.04    | (0.01) |
| <b>Formaldehyde</b>        |                |                |               |             |               |             |               |             |               |                 |               |             |               |             |               |         |        |
| <i>Random</i>              | d <sub>2</sub> | 0.84           | (0.02)        | 0.80        | (0.04)        | <b>0.85</b> | <b>(0.01)</b> | 0.81        | (0.04)        | 0.74            | (0.05)        | 0.66        | (0.08)        | <b>0.76</b> | <b>(0.03)</b> | 0.75    | (0.04) |
|                            | R <sup>2</sup> | 0.53           | (0.05)        | 0.44        | (0.07)        | <b>0.54</b> | <b>(0.03)</b> | 0.45        | (0.09)        | 0.48            | (0.05)        | 0.39        | (0.08)        | <b>0.52</b> | <b>(0.08)</b> | 0.45    | (0.09) |
|                            | MAE            | 0.80           | (0.03)        | 0.90        | (0.10)        | <b>0.81</b> | <b>(0.03)</b> | 0.86        | (0.05)        | 1.13            | (0.10)        | 1.27        | (0.22)        | <b>1.05</b> | <b>(0.04)</b> | 1.09    | (0.11) |
| <i>Row-wise</i>            | d <sub>2</sub> | 0.51           | (0.06)        | <b>0.53</b> | <b>(0.03)</b> | 0.40        | (0.06)        | 0.40        | (0.06)        | 0.16            | (0.12)        | <b>0.23</b> | <b>(0.14)</b> | 0.16        | (0.10)        | 0.16    | (0.10) |
|                            | R <sup>2</sup> | 0.05           | (0.04)        | <b>0.06</b> | <b>(0.03)</b> | 0.01        | (0.01)        | 0.01        | (0.01)        | 0.02            | (0.02)        | <b>0.03</b> | <b>(0.02)</b> | 0.02        | (0.02)        | 0.02    | (0.02) |
|                            | MAE            | 1.49           | (0.14)        | <b>1.58</b> | <b>(0.12)</b> | 1.79        | (0.14)        | 1.79        | (0.14)        | 3.92            | (1.37)        | <b>3.98</b> | <b>(1.84)</b> | 3.79        | (0.95)        | 3.79    | (0.95) |
| <b>Benzene</b>             |                |                |               |             |               |             |               |             |               |                 |               |             |               |             |               |         |        |
| <i>Random</i>              | d <sub>2</sub> | <b>0.87</b>    | <b>(0.03)</b> | 0.84        | (0.01)        | 0.87        | (0.02)        | 0.84        | (0.02)        | <b>0.88</b>     | <b>(0.04)</b> | 0.78        | (0.03)        | 0.83        | (0.05)        | 0.81    | (0.02) |
|                            | R <sup>2</sup> | <b>0.61</b>    | <b>(0.08)</b> | 0.52        | (0.03)        | 0.59        | (0.06)        | 0.52        | (0.05)        | <b>0.62</b>     | <b>(0.11)</b> | 0.41        | (0.06)        | 0.51        | (0.11)        | 0.46    | (0.05) |
|                            | MAE            | <b>0.17</b>    | <b>(0.02)</b> | 0.18        | (0.01)        | 0.17        | (0.01)        | 0.18        | (0.01)        | <b>0.14</b>     | <b>(0.02)</b> | 0.17        | (0.02)        | 0.17        | (0.01)        | 0.17    | (0.01) |
| <i>Row-wise</i>            | d <sub>2</sub> | <b>0.64</b>    | <b>(0.04)</b> | 0.63        | (0.03)        | 0.58        | (0.06)        | 0.57        | (0.06)        | <b>0.64</b>     | <b>(0.07)</b> | 0.63        | (0.04)        | 0.59        | (0.07)        | 0.58    | (0.07) |
|                            | R <sup>2</sup> | <b>0.20</b>    | <b>(0.05)</b> | 0.18        | (0.03)        | 0.13        | (0.05)        | 0.12        | (0.05)        | <b>0.20</b>     | <b>(0.07)</b> | 0.18        | (0.04)        | 0.14        | (0.08)        | 0.13    | (0.06) |
|                            | MAE            | <b>0.26</b>    | <b>(0.02)</b> | 0.28        | (0.02)        | 0.28        | (0.03)        | 0.27        | (0.01)        | <b>0.21</b>     | <b>(0.02)</b> | 0.22        | (0.02)        | 0.22        | (0.02)        | 0.23    | (0.01) |
| <b>1,3-Butadiene</b>       |                |                |               |             |               |             |               |             |               |                 |               |             |               |             |               |         |        |
| <i>Random</i>              | d <sub>2</sub> | 0.89           | (0.02)        | <b>0.89</b> | <b>(0.01)</b> | 0.87        | (0.01)        | 0.87        | (0.02)        | <b>0.81</b>     | <b>(0.07)</b> | 0.79        | (0.04)        | 0.78        | (0.05)        | 0.76    | (0.07) |
|                            | R <sup>2</sup> | 0.65           | (0.06)        | <b>0.65</b> | <b>(0.03)</b> | 0.58        | (0.03)        | 0.58        | (0.04)        | <b>0.54</b>     | <b>(0.11)</b> | 0.52        | (0.05)        | 0.44        | (0.09)        | 0.42    | (0.13) |
|                            | MAE            | 0.03           | (0.00)        | <b>0.03</b> | <b>(0.00)</b> | 0.03        | (0.00)        | 0.03        | (0.00)        | <b>0.03</b>     | <b>(0.00)</b> | 0.03        | (0.00)        | 0.03        | (0.00)        | 0.03    | (0.00) |
| <i>Row-wise</i>            | d <sub>2</sub> | <b>0.58</b>    | <b>(0.04)</b> | 0.50        | (0.03)        | 0.52        | (0.08)        | 0.46        | (0.05)        | <b>0.57</b>     | <b>(0.07)</b> | 0.48        | (0.04)        | 0.51        | (0.10)        | 0.42    | (0.03) |
|                            | R <sup>2</sup> | <b>0.09</b>    | <b>(0.03)</b> | 0.05        | (0.03)        | 0.07        | (0.05)        | 0.03        | (0.03)        | <b>0.14</b>     | <b>(0.07)</b> | 0.05        | (0.03)        | 0.10        | (0.07)        | 0.02    | (0.01) |
|                            | MAE            | <b>0.04</b>    | <b>(0.00)</b> | 0.04        | (0.00)        | 0.05        | (0.00)        | 0.04        | (0.00)        | <b>0.03</b>     | <b>(0.00)</b> | 0.03        | (0.00)        | 0.03        | (0.00)        | 0.03    | (0.00) |
| <b>Tetrachloroethylene</b> |                |                |               |             |               |             |               |             |               |                 |               |             |               |             |               |         |        |
| <i>Random</i>              | d <sub>2</sub> | 0.30           | (0.07)        | 0.27        | (0.03)        | 0.31        | (0.06)        | <b>0.33</b> | <b>(0.06)</b> | <b>0.29</b>     | <b>(0.06)</b> | 0.21        | (0.04)        | 0.28        | (0.04)        | 0.27    | (0.04) |
|                            | R <sup>2</sup> | 0.02           | (0.02)        | 0.01        | (0.01)        | 0.01        | (0.01)        | <b>0.01</b> | <b>(0.02)</b> | <b>0.02</b>     | <b>(0.02)</b> | 0.00        | (0.00)        | 0.01        | (0.01)        | 0.02    | (0.03) |
|                            | MAE            | 0.08           | (0.01)        | 0.08        | (0.00)        | 0.08        | (0.00)        | <b>0.07</b> | <b>(0.00)</b> | <b>0.06</b>     | <b>(0.00)</b> | 0.06        | (0.00)        | 0.06        | (0.00)        | 0.06    | (0.00) |
| <i>Row-wise</i>            | d <sub>2</sub> | <b>0.41</b>    | <b>(0.11)</b> | 0.38        | (0.10)        | -           | -             | 0.32        | (0.06)        | <b>0.40</b>     | <b>(0.14)</b> | 0.33        | (0.11)        | 0.31        | (0.12)        | 0.25    | (0.05) |
|                            | R <sup>2</sup> | <b>0.03</b>    | <b>(0.02)</b> | 0.02        | (0.01)        | -           | -             | 0.01        | (0.00)        | <b>0.07</b>     | <b>(0.07)</b> | 0.03        | (0.04)        | 0.02        | (0.04)        | 0.01    | (0.01) |
|                            | MAE            | <b>0.07</b>    | <b>(0.01)</b> | 0.08        | (0.01)        | -           | -             | 0.07        | (0.01)        | <b>0.05</b>     | <b>(0.00)</b> | 0.05        | (0.00)        | 0.05        | (0.00)        | 0.05    | (0.01) |
